# Supplementary material for: Ssl2/TFIIH function in Transcription Start Site Scanning by RNA Polymerase II in Saccharomyces cerevisiae
Source: bioRxiv preprint, doi:10.1101/2021.05.05.442816, version 3 (2021-09-28)
Supplement: Additional Table 1 [file 442816_file02.xlsx]

## Sheet: Yeast strains
Sheets	Annotations
1_ssl2 existing mutants	Yeast strains of the existing ssl2 mutants that are defective in Pol II transcription.
2_Human disease-related	Yeast strains containing human disease related XPB homologous mutations in Ssl2.
3_ssl2 screening	Screened ssl2 single mutants.
4_Genetic interaction between ssl2 and rpb1	Yeast strains used for genetic interaction tests between ssl2 and rpb1 mutants.
5_Genetic interaction between ssl2 and sua7	Yeast strains used for genetic interaction tests between ssl2 and sua7 mutants.
6_Genetic interaction between ssl2 and tfg2	Yeast strains used for genetic interaction tests between ssl2 and tfg2 mutants.
7_Genetic interaction between ssl2 and sub1	Yeast strains used for genetic interaction tests between ssl2 and sub1 mutants.

## Sheet: 1_ssl2 existing mutants
Strain number	Plasmids	Plasmid pCK	Genotype
CKY263			MATalpha ura3-52 his3∆200 leu2∆1 or ∆0 trp1∆63 met15∆0 lys2-128∂ gal10∆56
CKY860	pCK518 RPB1 CEN URA3		MATa leu2∆0 or ∆1 ura3-52 his3∆200 trp1∆63 met15∆0 lys2-128∂ RPB3::TAP::KlacTRP1 imd2∆::HIS3
CKY1471	pRSII316 SSL2	pCK1478	MATa ura3-52 his3Δ200 leu2Δ0 or Δ1 trp1Δ63 met15Δ0 lys2-128∂ gal10Δ56 RPB3::TAP::KlacTRP1 imd2Δ::HIS3 ssl2∆::hph
CKY1475	pRSII316 SSL2	pCK1478	MATa ura3-52 his3Δ200 leu2Δ0 or Δ1 trp1Δ63 met15Δ0 lys2-128∂ gal10Δ56 RPB3::TAP::KlacTRP1 ssl2∆::hph
CKY1595	pRS315 SSL2	pCK1480	MATa ura3-52 his3Δ200 leu2Δ0 or Δ1 trp1Δ63 met15Δ0 lys2-128∂ gal10Δ56 RPB3::TAP::KlacTRP1 imd2Δ::HIS3 ssl2∆::hph
CKY1596	pRS315 ssl2 E556K	pCK1501	MATa ura3-52 his3Δ200 leu2Δ0 or Δ1 trp1Δ63 met15Δ0 lys2-128∂ gal10Δ56 RPB3::TAP::KlacTRP1 imd2Δ::HIS3 ssl2∆::hph
CKY1597	pRS315 ssl2 V490A/H491D	pCK1502	MATa ura3-52 his3Δ200 leu2Δ0 or Δ1 trp1Δ63 met15Δ0 lys2-128∂ gal10Δ56 RPB3::TAP::KlacTRP1 imd2Δ::HIS3 ssl2∆::hph
CKY1598	pRS315 ssl2 W427L	pCK1503	MATa ura3-52 his3Δ200 leu2Δ0 or Δ1 trp1Δ63 met15Δ0 lys2-128∂ gal10Δ56 RPB3::TAP::KlacTRP1 imd2Δ::HIS3 ssl2∆::hph
CKY1600	pRS315 SSL2	pCK1480	MATa ura3-52 his3Δ200 leu2Δ0 or Δ1 trp1Δ63 met15Δ0 lys2-128∂ gal10Δ56 RPB3::TAP::KlacTRP1 ssl2∆::hph
CKY1601	pRS315 ssl2 E556K	pCK1501	MATa ura3-52 his3Δ200 leu2Δ0 or Δ1 trp1Δ63 met15Δ0 lys2-128∂ gal10Δ56 RPB3::TAP::KlacTRP1 ssl2∆::hph
CKY1602	pRS315 ssl2 V490A/H491D	pCK1502	MATa ura3-52 his3Δ200 leu2Δ0 or Δ1 trp1Δ63 met15Δ0 lys2-128∂ gal10Δ56 RPB3::TAP::KlacTRP1 ssl2∆::hph
CKY1603	pRS315 ssl2 W427L	pCK1503	MATa ura3-52 his3Δ200 leu2Δ0 or Δ1 trp1Δ63 met15Δ0 lys2-128∂ gal10Δ56 RPB3::TAP::KlacTRP1 ssl2∆::hph
CKY1652	pRS315 ssl2 H508R	pCK1518	MATa ura3-52 his3Δ200 leu2Δ0 or Δ1 trp1Δ63 met15Δ0 lys2-128∂ gal10Δ56 RPB3::TAP::KlacTRP1 imd2Δ::HIS3 ssl2∆::hph
CKY1653	pRS315 ssl2 V552I/E556K	pCK1519	MATa ura3-52 his3Δ200 leu2Δ0 or Δ1 trp1Δ63 met15Δ0 lys2-128∂ gal10Δ56 RPB3::TAP::KlacTRP1 imd2Δ::HIS3 ssl2∆::hph
CKY1654	pRS315 ssl2 H508R	pCK1518	MATa ura3-52 his3Δ200 leu2Δ0 or Δ1 trp1Δ63 met15Δ0 lys2-128∂ gal10Δ56 RPB3::TAP::KlacTRP1 ssl2∆::hph
CKY1655	pRS315 ssl2 V552I/E556K	pCK1519	MATa ura3-52 his3Δ200 leu2Δ0 or Δ1 trp1Δ63 met15Δ0 lys2-128∂ gal10Δ56 RPB3::TAP::KlacTRP1 ssl2∆::hph

## Sheet: 2_Human disease related
Strain number	Plasmids	Plasmid pCK	Genotype
CKY2410	pRS315 SSL2	pCK1480	MATa ura3-52 his3Δ200 leu2Δ0 or Δ1 trp1Δ63 met15Δ0 lys2-128∂ gal10Δ56 RPB3::TAP::KlacTRP1 imd2Δ::HIS3 ssl2∆::hph
CKY2411	pRS315 SSL2	pCK1480	MATa ura3-52 his3Δ200 leu2Δ0 or Δ1 trp1Δ63 met15Δ0 lys2-128∂ gal10Δ56 RPB3::TAP::KlacTRP1 imd2Δ::HIS3 ssl2∆::hph
CKY2412	pRS315 ssl2 F156S	pCK1820	MATa ura3-52 his3Δ200 leu2Δ0 or Δ1 trp1Δ63 met15Δ0 lys2-128∂ gal10Δ56 RPB3::TAP::KlacTRP1 imd2Δ::HIS3 ssl2∆::hph
CKY2413	pRS315 ssl2 F156S	pCK1820	MATa ura3-52 his3Δ200 leu2Δ0 or Δ1 trp1Δ63 met15Δ0 lys2-128∂ gal10Δ56 RPB3::TAP::KlacTRP1 imd2Δ::HIS3 ssl2∆::hph
CKY2414	pRS315 ssl2 Y750*	pCK1822	MATa ura3-52 his3Δ200 leu2Δ0 or Δ1 trp1Δ63 met15Δ0 lys2-128∂ gal10Δ56 RPB3::TAP::KlacTRP1 imd2Δ::HIS3 ssl2∆::hph
CKY2415	pRS315 ssl2 Y750*	pCK1822	MATa ura3-52 his3Δ200 leu2Δ0 or Δ1 trp1Δ63 met15Δ0 lys2-128∂ gal10Δ56 RPB3::TAP::KlacTRP1 imd2Δ::HIS3 ssl2∆::hph
CKY2416	pRS315 SSL2	pCK1480	MATa ura3-52 his3Δ200 leu2Δ0 or Δ1 trp1Δ63 met15Δ0 lys2-128∂ gal10Δ56 RPB3::TAP::KlacTRP1 ssl2∆::hph
CKY2417	pRS315 SSL2	pCK1480	MATa ura3-52 his3Δ200 leu2Δ0 or Δ1 trp1Δ63 met15Δ0 lys2-128∂ gal10Δ56 RPB3::TAP::KlacTRP1 ssl2∆::hph
CKY2418	pRS315 ssl2 F156S	pCK1820	MATa ura3-52 his3Δ200 leu2Δ0 or Δ1 trp1Δ63 met15Δ0 lys2-128∂ gal10Δ56 RPB3::TAP::KlacTRP1 ssl2∆::hph
CKY2419	pRS315 ssl2 F156S	pCK1820	MATa ura3-52 his3Δ200 leu2Δ0 or Δ1 trp1Δ63 met15Δ0 lys2-128∂ gal10Δ56 RPB3::TAP::KlacTRP1 ssl2∆::hph
CKY2420	pRS315 ssl2 Y750*	pCK1822	MATa ura3-52 his3Δ200 leu2Δ0 or Δ1 trp1Δ63 met15Δ0 lys2-128∂ gal10Δ56 RPB3::TAP::KlacTRP1 ssl2∆::hph
CKY2421	pRS315 ssl2 Y750*	pCK1822	MATa ura3-52 his3Δ200 leu2Δ0 or Δ1 trp1Δ63 met15Δ0 lys2-128∂ gal10Δ56 RPB3::TAP::KlacTRP1 ssl2∆::hph
CKY2473	pRS315 ssl2 T176P	pCK1996	MATa ura3-52 his3Δ200 leu2Δ0 or Δ1 trp1Δ63 met15Δ0 lys2-128∂ gal10Δ56 RPB3::TAP::KlacTRP1 imd2Δ::HIS3 ssl2∆::hph
CKY2474	pRS315 ssl2 T176P	pCK1996	MATa ura3-52 his3Δ200 leu2Δ0 or Δ1 trp1Δ63 met15Δ0 lys2-128∂ gal10Δ56 RPB3::TAP::KlacTRP1 imd2Δ::HIS3 ssl2∆::hph
CKY2489	pRS315 SSL2	pCK1480	MATa ura3-52 his3Δ200 leu2Δ0 or Δ1 trp1Δ63 met15Δ0 lys2-128∂ gal10Δ56 RPB3::TAP::KlacTRP1 imd2Δ::HIS3 ssl2∆::hph
CKY2490	pRS315 SSL2	pCK1480	MATa ura3-52 his3Δ200 leu2Δ0 or Δ1 trp1Δ63 met15Δ0 lys2-128∂ gal10Δ56 RPB3::TAP::KlacTRP1 imd2Δ::HIS3 ssl2∆::hph
CKY2491	pRS315 ssl2 T176P	pCK1996	MATa ura3-52 his3Δ200 leu2Δ0 or Δ1 trp1Δ63 met15Δ0 lys2-128∂ gal10Δ56 RPB3::TAP::KlacTRP1 ssl2∆::hph
CKY2492	pRS315 ssl2 T176P	pCK1996	MATa ura3-52 his3Δ200 leu2Δ0 or Δ1 trp1Δ63 met15Δ0 lys2-128∂ gal10Δ56 RPB3::TAP::KlacTRP1 ssl2∆::hph
CKY2507	pRS315 SSL2	pCK1480	MATa ura3-52 his3Δ200 leu2Δ0 or Δ1 trp1Δ63 met15Δ0 lys2-128∂ gal10Δ56 RPB3::TAP::KlacTRP1 ssl2∆::hph
CKY2508	pRS315 SSL2	pCK1480	MATa ura3-52 his3Δ200 leu2Δ0 or Δ1 trp1Δ63 met15Δ0 lys2-128∂ gal10Δ56 RPB3::TAP::KlacTRP1 ssl2∆::hph

## Sheet: 3_ssl2 screening
Strain number	Plasmids	Plasmid pCK	Genotype
CKY2238	pRS315 SSL2	pCK1480	MATa ura3-52 his3Δ200 leu2Δ0 or Δ1 trp1Δ63 met15Δ0 lys2-128∂ gal10Δ56 RPB3::TAP::KlacTRP1 imd2Δ::HIS3 ssl2∆::hph
CKY2239	pRS315 SSL2	pCK1480	MATa ura3-52 his3Δ200 leu2Δ0 or Δ1 trp1Δ63 met15Δ0 lys2-128∂ gal10Δ56 RPB3::TAP::KlacTRP1 imd2Δ::HIS3 ssl2∆::hph
CKY2240	pRS315 SSL2	pCK1480	MATa ura3-52 his3Δ200 leu2Δ0 or Δ1 trp1Δ63 met15Δ0 lys2-128∂ gal10Δ56 RPB3::TAP::KlacTRP1 ssl2∆::hph
CKY2241	pRS315 SSL2	pCK1480	MATa ura3-52 his3Δ200 leu2Δ0 or Δ1 trp1Δ63 met15Δ0 lys2-128∂ gal10Δ56 RPB3::TAP::KlacTRP1 ssl2∆::hph
CKY2242	pRS315 ssl2 I170T	pCK1826	MATa ura3-52 his3Δ200 leu2Δ0 or Δ1 trp1Δ63 met15Δ0 lys2-128∂ gal10Δ56 RPB3::TAP::KlacTRP1 imd2Δ::HIS3 ssl2∆::hph
CKY2243	pRS315 ssl2 I170T	pCK1826	MATa ura3-52 his3Δ200 leu2Δ0 or Δ1 trp1Δ63 met15Δ0 lys2-128∂ gal10Δ56 RPB3::TAP::KlacTRP1 imd2Δ::HIS3 ssl2∆::hph
CKY2244	pRS315 ssl2 I170T	pCK1826	MATa ura3-52 his3Δ200 leu2Δ0 or Δ1 trp1Δ63 met15Δ0 lys2-128∂ gal10Δ56 RPB3::TAP::KlacTRP1 ssl2∆::hph
CKY2245	pRS315 ssl2 I170T	pCK1826	MATa ura3-52 his3Δ200 leu2Δ0 or Δ1 trp1Δ63 met15Δ0 lys2-128∂ gal10Δ56 RPB3::TAP::KlacTRP1 ssl2∆::hph
CKY2246	pRS315 ssl2 L180S	pCK1827	MATa ura3-52 his3Δ200 leu2Δ0 or Δ1 trp1Δ63 met15Δ0 lys2-128∂ gal10Δ56 RPB3::TAP::KlacTRP1 imd2Δ::HIS3 ssl2∆::hph
CKY2247	pRS315 ssl2 L180S	pCK1827	MATa ura3-52 his3Δ200 leu2Δ0 or Δ1 trp1Δ63 met15Δ0 lys2-128∂ gal10Δ56 RPB3::TAP::KlacTRP1 imd2Δ::HIS3 ssl2∆::hph
CKY2248	pRS315 ssl2 L180S	pCK1827	MATa ura3-52 his3Δ200 leu2Δ0 or Δ1 trp1Δ63 met15Δ0 lys2-128∂ gal10Δ56 RPB3::TAP::KlacTRP1 ssl2∆::hph
CKY2249	pRS315 ssl2 L180S	pCK1827	MATa ura3-52 his3Δ200 leu2Δ0 or Δ1 trp1Δ63 met15Δ0 lys2-128∂ gal10Δ56 RPB3::TAP::KlacTRP1 ssl2∆::hph
CKY2250	pRS315 ssl2 S185Y	pCK1828	MATa ura3-52 his3Δ200 leu2Δ0 or Δ1 trp1Δ63 met15Δ0 lys2-128∂ gal10Δ56 RPB3::TAP::KlacTRP1 imd2Δ::HIS3 ssl2∆::hph
CKY2251	pRS315 ssl2 S185Y	pCK1828	MATa ura3-52 his3Δ200 leu2Δ0 or Δ1 trp1Δ63 met15Δ0 lys2-128∂ gal10Δ56 RPB3::TAP::KlacTRP1 imd2Δ::HIS3 ssl2∆::hph
CKY2252	pRS315 ssl2 S185Y	pCK1828	MATa ura3-52 his3Δ200 leu2Δ0 or Δ1 trp1Δ63 met15Δ0 lys2-128∂ gal10Δ56 RPB3::TAP::KlacTRP1 ssl2∆::hph
CKY2253	pRS315 ssl2 S185Y	pCK1828	MATa ura3-52 his3Δ200 leu2Δ0 or Δ1 trp1Δ63 met15Δ0 lys2-128∂ gal10Δ56 RPB3::TAP::KlacTRP1 ssl2∆::hph
CKY2254	pRS315 ssl2 S201Y	pCK1829	MATa ura3-52 his3Δ200 leu2Δ0 or Δ1 trp1Δ63 met15Δ0 lys2-128∂ gal10Δ56 RPB3::TAP::KlacTRP1 imd2Δ::HIS3 ssl2∆::hph
CKY2255	pRS315 ssl2 S201Y	pCK1829	MATa ura3-52 his3Δ200 leu2Δ0 or Δ1 trp1Δ63 met15Δ0 lys2-128∂ gal10Δ56 RPB3::TAP::KlacTRP1 imd2Δ::HIS3 ssl2∆::hph
CKY2256	pRS315 ssl2 S201Y	pCK1829	MATa ura3-52 his3Δ200 leu2Δ0 or Δ1 trp1Δ63 met15Δ0 lys2-128∂ gal10Δ56 RPB3::TAP::KlacTRP1 ssl2∆::hph
CKY2257	pRS315 ssl2 S201Y	pCK1829	MATa ura3-52 his3Δ200 leu2Δ0 or Δ1 trp1Δ63 met15Δ0 lys2-128∂ gal10Δ56 RPB3::TAP::KlacTRP1 ssl2∆::hph
CKY2258	pRS315 ssl2 I218T	pCK1830	MATa ura3-52 his3Δ200 leu2Δ0 or Δ1 trp1Δ63 met15Δ0 lys2-128∂ gal10Δ56 RPB3::TAP::KlacTRP1 imd2Δ::HIS3 ssl2∆::hph
CKY2259	pRS315 ssl2 I218T	pCK1830	MATa ura3-52 his3Δ200 leu2Δ0 or Δ1 trp1Δ63 met15Δ0 lys2-128∂ gal10Δ56 RPB3::TAP::KlacTRP1 imd2Δ::HIS3 ssl2∆::hph
CKY2260	pRS315 ssl2 I218T	pCK1830	MATa ura3-52 his3Δ200 leu2Δ0 or Δ1 trp1Δ63 met15Δ0 lys2-128∂ gal10Δ56 RPB3::TAP::KlacTRP1 ssl2∆::hph
CKY2261	pRS315 ssl2 I218T	pCK1830	MATa ura3-52 his3Δ200 leu2Δ0 or Δ1 trp1Δ63 met15Δ0 lys2-128∂ gal10Δ56 RPB3::TAP::KlacTRP1 ssl2∆::hph
CKY2262	pRS315 ssl2 L225P	pCK1831	MATa ura3-52 his3Δ200 leu2Δ0 or Δ1 trp1Δ63 met15Δ0 lys2-128∂ gal10Δ56 RPB3::TAP::KlacTRP1 imd2Δ::HIS3 ssl2∆::hph
CKY2263	pRS315 ssl2 L225P	pCK1831	MATa ura3-52 his3Δ200 leu2Δ0 or Δ1 trp1Δ63 met15Δ0 lys2-128∂ gal10Δ56 RPB3::TAP::KlacTRP1 imd2Δ::HIS3 ssl2∆::hph
CKY2264	pRS315 ssl2 L225P	pCK1831	MATa ura3-52 his3Δ200 leu2Δ0 or Δ1 trp1Δ63 met15Δ0 lys2-128∂ gal10Δ56 RPB3::TAP::KlacTRP1 ssl2∆::hph
CKY2265	pRS315 ssl2 L225P	pCK1831	MATa ura3-52 his3Δ200 leu2Δ0 or Δ1 trp1Δ63 met15Δ0 lys2-128∂ gal10Δ56 RPB3::TAP::KlacTRP1 ssl2∆::hph
CKY2266	pRS315 ssl2 V226D	pCK1832	MATa ura3-52 his3Δ200 leu2Δ0 or Δ1 trp1Δ63 met15Δ0 lys2-128∂ gal10Δ56 RPB3::TAP::KlacTRP1 imd2Δ::HIS3 ssl2∆::hph
CKY2267	pRS315 ssl2 V226D	pCK1832	MATa ura3-52 his3Δ200 leu2Δ0 or Δ1 trp1Δ63 met15Δ0 lys2-128∂ gal10Δ56 RPB3::TAP::KlacTRP1 imd2Δ::HIS3 ssl2∆::hph
CKY2268	pRS315 ssl2 V226D	pCK1832	MATa ura3-52 his3Δ200 leu2Δ0 or Δ1 trp1Δ63 met15Δ0 lys2-128∂ gal10Δ56 RPB3::TAP::KlacTRP1 ssl2∆::hph
CKY2269	pRS315 ssl2 V226D	pCK1832	MATa ura3-52 his3Δ200 leu2Δ0 or Δ1 trp1Δ63 met15Δ0 lys2-128∂ gal10Δ56 RPB3::TAP::KlacTRP1 ssl2∆::hph
CKY2270	pRS315 ssl2 N230S	pCK1833	MATa ura3-52 his3Δ200 leu2Δ0 or Δ1 trp1Δ63 met15Δ0 lys2-128∂ gal10Δ56 RPB3::TAP::KlacTRP1 imd2Δ::HIS3 ssl2∆::hph
CKY2271	pRS315 ssl2 N230S	pCK1833	MATa ura3-52 his3Δ200 leu2Δ0 or Δ1 trp1Δ63 met15Δ0 lys2-128∂ gal10Δ56 RPB3::TAP::KlacTRP1 imd2Δ::HIS3 ssl2∆::hph
CKY2272	pRS315 ssl2 N230S	pCK1833	MATa ura3-52 his3Δ200 leu2Δ0 or Δ1 trp1Δ63 met15Δ0 lys2-128∂ gal10Δ56 RPB3::TAP::KlacTRP1 ssl2∆::hph
CKY2273	pRS315 ssl2 N230S	pCK1833	MATa ura3-52 his3Δ200 leu2Δ0 or Δ1 trp1Δ63 met15Δ0 lys2-128∂ gal10Δ56 RPB3::TAP::KlacTRP1 ssl2∆::hph
CKY2274	pRS315 ssl2 N230I	pCK1834	MATa ura3-52 his3Δ200 leu2Δ0 or Δ1 trp1Δ63 met15Δ0 lys2-128∂ gal10Δ56 RPB3::TAP::KlacTRP1 imd2Δ::HIS3 ssl2∆::hph
CKY2275	pRS315 ssl2 N230I	pCK1834	MATa ura3-52 his3Δ200 leu2Δ0 or Δ1 trp1Δ63 met15Δ0 lys2-128∂ gal10Δ56 RPB3::TAP::KlacTRP1 imd2Δ::HIS3 ssl2∆::hph
CKY2276	pRS315 ssl2 N230I	pCK1834	MATa ura3-52 his3Δ200 leu2Δ0 or Δ1 trp1Δ63 met15Δ0 lys2-128∂ gal10Δ56 RPB3::TAP::KlacTRP1 ssl2∆::hph
CKY2277	pRS315 ssl2 N230I	pCK1834	MATa ura3-52 his3Δ200 leu2Δ0 or Δ1 trp1Δ63 met15Δ0 lys2-128∂ gal10Δ56 RPB3::TAP::KlacTRP1 ssl2∆::hph
CKY2278	pRS315 ssl2 N230D	pCK1835	MATa ura3-52 his3Δ200 leu2Δ0 or Δ1 trp1Δ63 met15Δ0 lys2-128∂ gal10Δ56 RPB3::TAP::KlacTRP1 imd2Δ::HIS3 ssl2∆::hph
CKY2279	pRS315 ssl2 N230D	pCK1835	MATa ura3-52 his3Δ200 leu2Δ0 or Δ1 trp1Δ63 met15Δ0 lys2-128∂ gal10Δ56 RPB3::TAP::KlacTRP1 imd2Δ::HIS3 ssl2∆::hph
CKY2280	pRS315 ssl2 N230D	pCK1835	MATa ura3-52 his3Δ200 leu2Δ0 or Δ1 trp1Δ63 met15Δ0 lys2-128∂ gal10Δ56 RPB3::TAP::KlacTRP1 ssl2∆::hph
CKY2281	pRS315 ssl2 N230D	pCK1835	MATa ura3-52 his3Δ200 leu2Δ0 or Δ1 trp1Δ63 met15Δ0 lys2-128∂ gal10Δ56 RPB3::TAP::KlacTRP1 ssl2∆::hph
CKY2282	pRS315 ssl2 Y232D	pCK1836	MATa ura3-52 his3Δ200 leu2Δ0 or Δ1 trp1Δ63 met15Δ0 lys2-128∂ gal10Δ56 RPB3::TAP::KlacTRP1 imd2Δ::HIS3 ssl2∆::hph
CKY2283	pRS315 ssl2 Y232D	pCK1836	MATa ura3-52 his3Δ200 leu2Δ0 or Δ1 trp1Δ63 met15Δ0 lys2-128∂ gal10Δ56 RPB3::TAP::KlacTRP1 imd2Δ::HIS3 ssl2∆::hph
CKY2284	pRS315 ssl2 Y232D	pCK1836	MATa ura3-52 his3Δ200 leu2Δ0 or Δ1 trp1Δ63 met15Δ0 lys2-128∂ gal10Δ56 RPB3::TAP::KlacTRP1 ssl2∆::hph
CKY2285	pRS315 ssl2 Y232D	pCK1836	MATa ura3-52 his3Δ200 leu2Δ0 or Δ1 trp1Δ63 met15Δ0 lys2-128∂ gal10Δ56 RPB3::TAP::KlacTRP1 ssl2∆::hph
CKY2286	pRS315 ssl2 L246P	pCK1837	MATa ura3-52 his3Δ200 leu2Δ0 or Δ1 trp1Δ63 met15Δ0 lys2-128∂ gal10Δ56 RPB3::TAP::KlacTRP1 imd2Δ::HIS3 ssl2∆::hph
CKY2287	pRS315 ssl2 L246P	pCK1837	MATa ura3-52 his3Δ200 leu2Δ0 or Δ1 trp1Δ63 met15Δ0 lys2-128∂ gal10Δ56 RPB3::TAP::KlacTRP1 imd2Δ::HIS3 ssl2∆::hph
CKY2288	pRS315 ssl2 L246P	pCK1837	MATa ura3-52 his3Δ200 leu2Δ0 or Δ1 trp1Δ63 met15Δ0 lys2-128∂ gal10Δ56 RPB3::TAP::KlacTRP1 ssl2∆::hph
CKY2289	pRS315 ssl2 L246P	pCK1837	MATa ura3-52 his3Δ200 leu2Δ0 or Δ1 trp1Δ63 met15Δ0 lys2-128∂ gal10Δ56 RPB3::TAP::KlacTRP1 ssl2∆::hph
CKY2290	pRS315 ssl2 V268A	pCK1838	MATa ura3-52 his3Δ200 leu2Δ0 or Δ1 trp1Δ63 met15Δ0 lys2-128∂ gal10Δ56 RPB3::TAP::KlacTRP1 imd2Δ::HIS3 ssl2∆::hph
CKY2291	pRS315 ssl2 V268A	pCK1838	MATa ura3-52 his3Δ200 leu2Δ0 or Δ1 trp1Δ63 met15Δ0 lys2-128∂ gal10Δ56 RPB3::TAP::KlacTRP1 imd2Δ::HIS3 ssl2∆::hph
CKY2292	pRS315 ssl2 V268A	pCK1838	MATa ura3-52 his3Δ200 leu2Δ0 or Δ1 trp1Δ63 met15Δ0 lys2-128∂ gal10Δ56 RPB3::TAP::KlacTRP1 ssl2∆::hph
CKY2293	pRS315 ssl2 V268A	pCK1838	MATa ura3-52 his3Δ200 leu2Δ0 or Δ1 trp1Δ63 met15Δ0 lys2-128∂ gal10Δ56 RPB3::TAP::KlacTRP1 ssl2∆::hph
CKY2294	pRS315 ssl2 N320Y	pCK1839	MATa ura3-52 his3Δ200 leu2Δ0 or Δ1 trp1Δ63 met15Δ0 lys2-128∂ gal10Δ56 RPB3::TAP::KlacTRP1 imd2Δ::HIS3 ssl2∆::hph
CKY2295	pRS315 ssl2 N320Y	pCK1839	MATa ura3-52 his3Δ200 leu2Δ0 or Δ1 trp1Δ63 met15Δ0 lys2-128∂ gal10Δ56 RPB3::TAP::KlacTRP1 imd2Δ::HIS3 ssl2∆::hph
CKY2296	pRS315 ssl2 N320Y	pCK1839	MATa ura3-52 his3Δ200 leu2Δ0 or Δ1 trp1Δ63 met15Δ0 lys2-128∂ gal10Δ56 RPB3::TAP::KlacTRP1 ssl2∆::hph
CKY2297	pRS315 ssl2 N320Y	pCK1839	MATa ura3-52 his3Δ200 leu2Δ0 or Δ1 trp1Δ63 met15Δ0 lys2-128∂ gal10Δ56 RPB3::TAP::KlacTRP1 ssl2∆::hph
CKY2298	pRS315 ssl2 K328N	pCK1840	MATa ura3-52 his3Δ200 leu2Δ0 or Δ1 trp1Δ63 met15Δ0 lys2-128∂ gal10Δ56 RPB3::TAP::KlacTRP1 imd2Δ::HIS3 ssl2∆::hph
CKY2299	pRS315 ssl2 K328N	pCK1840	MATa ura3-52 his3Δ200 leu2Δ0 or Δ1 trp1Δ63 met15Δ0 lys2-128∂ gal10Δ56 RPB3::TAP::KlacTRP1 imd2Δ::HIS3 ssl2∆::hph
CKY2300	pRS315 ssl2 K328N	pCK1840	MATa ura3-52 his3Δ200 leu2Δ0 or Δ1 trp1Δ63 met15Δ0 lys2-128∂ gal10Δ56 RPB3::TAP::KlacTRP1 ssl2∆::hph
CKY2301	pRS315 ssl2 K328N	pCK1840	MATa ura3-52 his3Δ200 leu2Δ0 or Δ1 trp1Δ63 met15Δ0 lys2-128∂ gal10Δ56 RPB3::TAP::KlacTRP1 ssl2∆::hph
CKY2302	pRS315 ssl2 E340G	pCK1841	MATa ura3-52 his3Δ200 leu2Δ0 or Δ1 trp1Δ63 met15Δ0 lys2-128∂ gal10Δ56 RPB3::TAP::KlacTRP1 imd2Δ::HIS3 ssl2∆::hph
CKY2303	pRS315 ssl2 E340G	pCK1841	MATa ura3-52 his3Δ200 leu2Δ0 or Δ1 trp1Δ63 met15Δ0 lys2-128∂ gal10Δ56 RPB3::TAP::KlacTRP1 imd2Δ::HIS3 ssl2∆::hph
CKY2304	pRS315 ssl2 E340G	pCK1841	MATa ura3-52 his3Δ200 leu2Δ0 or Δ1 trp1Δ63 met15Δ0 lys2-128∂ gal10Δ56 RPB3::TAP::KlacTRP1 ssl2∆::hph
CKY2305	pRS315 ssl2 E340G	pCK1841	MATa ura3-52 his3Δ200 leu2Δ0 or Δ1 trp1Δ63 met15Δ0 lys2-128∂ gal10Δ56 RPB3::TAP::KlacTRP1 ssl2∆::hph
CKY2306	pRS315 ssl2 N345T	pCK1842	MATa ura3-52 his3Δ200 leu2Δ0 or Δ1 trp1Δ63 met15Δ0 lys2-128∂ gal10Δ56 RPB3::TAP::KlacTRP1 imd2Δ::HIS3 ssl2∆::hph
CKY2307	pRS315 ssl2 N345T	pCK1842	MATa ura3-52 his3Δ200 leu2Δ0 or Δ1 trp1Δ63 met15Δ0 lys2-128∂ gal10Δ56 RPB3::TAP::KlacTRP1 imd2Δ::HIS3 ssl2∆::hph
CKY2308	pRS315 ssl2 N345T	pCK1842	MATa ura3-52 his3Δ200 leu2Δ0 or Δ1 trp1Δ63 met15Δ0 lys2-128∂ gal10Δ56 RPB3::TAP::KlacTRP1 ssl2∆::hph
CKY2309	pRS315 ssl2 N345T	pCK1842	MATa ura3-52 his3Δ200 leu2Δ0 or Δ1 trp1Δ63 met15Δ0 lys2-128∂ gal10Δ56 RPB3::TAP::KlacTRP1 ssl2∆::hph
CKY2310	pRS315 ssl2 D346G	pCK1843	MATa ura3-52 his3Δ200 leu2Δ0 or Δ1 trp1Δ63 met15Δ0 lys2-128∂ gal10Δ56 RPB3::TAP::KlacTRP1 imd2Δ::HIS3 ssl2∆::hph
CKY2311	pRS315 ssl2 D346G	pCK1843	MATa ura3-52 his3Δ200 leu2Δ0 or Δ1 trp1Δ63 met15Δ0 lys2-128∂ gal10Δ56 RPB3::TAP::KlacTRP1 imd2Δ::HIS3 ssl2∆::hph
CKY2312	pRS315 ssl2 D346G	pCK1843	MATa ura3-52 his3Δ200 leu2Δ0 or Δ1 trp1Δ63 met15Δ0 lys2-128∂ gal10Δ56 RPB3::TAP::KlacTRP1 ssl2∆::hph
CKY2313	pRS315 ssl2 D346G	pCK1843	MATa ura3-52 his3Δ200 leu2Δ0 or Δ1 trp1Δ63 met15Δ0 lys2-128∂ gal10Δ56 RPB3::TAP::KlacTRP1 ssl2∆::hph
CKY2314	pRS315 ssl2 N349D	pCK1844	MATa ura3-52 his3Δ200 leu2Δ0 or Δ1 trp1Δ63 met15Δ0 lys2-128∂ gal10Δ56 RPB3::TAP::KlacTRP1 imd2Δ::HIS3 ssl2∆::hph
CKY2315	pRS315 ssl2 N349D	pCK1844	MATa ura3-52 his3Δ200 leu2Δ0 or Δ1 trp1Δ63 met15Δ0 lys2-128∂ gal10Δ56 RPB3::TAP::KlacTRP1 imd2Δ::HIS3 ssl2∆::hph
CKY2316	pRS315 ssl2 N349D	pCK1844	MATa ura3-52 his3Δ200 leu2Δ0 or Δ1 trp1Δ63 met15Δ0 lys2-128∂ gal10Δ56 RPB3::TAP::KlacTRP1 ssl2∆::hph
CKY2317	pRS315 ssl2 N349D	pCK1844	MATa ura3-52 his3Δ200 leu2Δ0 or Δ1 trp1Δ63 met15Δ0 lys2-128∂ gal10Δ56 RPB3::TAP::KlacTRP1 ssl2∆::hph
CKY2318	pRS315 ssl2 K357R	pCK1845	MATa ura3-52 his3Δ200 leu2Δ0 or Δ1 trp1Δ63 met15Δ0 lys2-128∂ gal10Δ56 RPB3::TAP::KlacTRP1 imd2Δ::HIS3 ssl2∆::hph
CKY2319	pRS315 ssl2 K357R	pCK1845	MATa ura3-52 his3Δ200 leu2Δ0 or Δ1 trp1Δ63 met15Δ0 lys2-128∂ gal10Δ56 RPB3::TAP::KlacTRP1 imd2Δ::HIS3 ssl2∆::hph
CKY2320	pRS315 ssl2 K357R	pCK1845	MATa ura3-52 his3Δ200 leu2Δ0 or Δ1 trp1Δ63 met15Δ0 lys2-128∂ gal10Δ56 RPB3::TAP::KlacTRP1 ssl2∆::hph
CKY2321	pRS315 ssl2 K357R	pCK1845	MATa ura3-52 his3Δ200 leu2Δ0 or Δ1 trp1Δ63 met15Δ0 lys2-128∂ gal10Δ56 RPB3::TAP::KlacTRP1 ssl2∆::hph
CKY2322	pRS315 ssl2 K357E	pCK1846	MATa ura3-52 his3Δ200 leu2Δ0 or Δ1 trp1Δ63 met15Δ0 lys2-128∂ gal10Δ56 RPB3::TAP::KlacTRP1 imd2Δ::HIS3 ssl2∆::hph
CKY2323	pRS315 ssl2 K357E	pCK1846	MATa ura3-52 his3Δ200 leu2Δ0 or Δ1 trp1Δ63 met15Δ0 lys2-128∂ gal10Δ56 RPB3::TAP::KlacTRP1 imd2Δ::HIS3 ssl2∆::hph
CKY2324	pRS315 ssl2 K357E	pCK1846	MATa ura3-52 his3Δ200 leu2Δ0 or Δ1 trp1Δ63 met15Δ0 lys2-128∂ gal10Δ56 RPB3::TAP::KlacTRP1 ssl2∆::hph
CKY2325	pRS315 ssl2 K357E	pCK1846	MATa ura3-52 his3Δ200 leu2Δ0 or Δ1 trp1Δ63 met15Δ0 lys2-128∂ gal10Δ56 RPB3::TAP::KlacTRP1 ssl2∆::hph
CKY2326	pRS315 ssl2 K372E	pCK1847	MATa ura3-52 his3Δ200 leu2Δ0 or Δ1 trp1Δ63 met15Δ0 lys2-128∂ gal10Δ56 RPB3::TAP::KlacTRP1 imd2Δ::HIS3 ssl2∆::hph
CKY2327	pRS315 ssl2 K372E	pCK1847	MATa ura3-52 his3Δ200 leu2Δ0 or Δ1 trp1Δ63 met15Δ0 lys2-128∂ gal10Δ56 RPB3::TAP::KlacTRP1 imd2Δ::HIS3 ssl2∆::hph
CKY2328	pRS315 ssl2 K372E	pCK1847	MATa ura3-52 his3Δ200 leu2Δ0 or Δ1 trp1Δ63 met15Δ0 lys2-128∂ gal10Δ56 RPB3::TAP::KlacTRP1 ssl2∆::hph
CKY2329	pRS315 ssl2 K372E	pCK1847	MATa ura3-52 his3Δ200 leu2Δ0 or Δ1 trp1Δ63 met15Δ0 lys2-128∂ gal10Δ56 RPB3::TAP::KlacTRP1 ssl2∆::hph
CKY2330	pRS315 ssl2 G382V	pCK1848	MATa ura3-52 his3Δ200 leu2Δ0 or Δ1 trp1Δ63 met15Δ0 lys2-128∂ gal10Δ56 RPB3::TAP::KlacTRP1 imd2Δ::HIS3 ssl2∆::hph
CKY2331	pRS315 ssl2 G382V	pCK1848	MATa ura3-52 his3Δ200 leu2Δ0 or Δ1 trp1Δ63 met15Δ0 lys2-128∂ gal10Δ56 RPB3::TAP::KlacTRP1 imd2Δ::HIS3 ssl2∆::hph
CKY2332	pRS315 ssl2 G382V	pCK1848	MATa ura3-52 his3Δ200 leu2Δ0 or Δ1 trp1Δ63 met15Δ0 lys2-128∂ gal10Δ56 RPB3::TAP::KlacTRP1 ssl2∆::hph
CKY2333	pRS315 ssl2 G382V	pCK1848	MATa ura3-52 his3Δ200 leu2Δ0 or Δ1 trp1Δ63 met15Δ0 lys2-128∂ gal10Δ56 RPB3::TAP::KlacTRP1 ssl2∆::hph
CKY2334	pRS315 ssl2 I383T	pCK1849	MATa ura3-52 his3Δ200 leu2Δ0 or Δ1 trp1Δ63 met15Δ0 lys2-128∂ gal10Δ56 RPB3::TAP::KlacTRP1 imd2Δ::HIS3 ssl2∆::hph
CKY2335	pRS315 ssl2 I383T	pCK1849	MATa ura3-52 his3Δ200 leu2Δ0 or Δ1 trp1Δ63 met15Δ0 lys2-128∂ gal10Δ56 RPB3::TAP::KlacTRP1 imd2Δ::HIS3 ssl2∆::hph
CKY2336	pRS315 ssl2 I383T	pCK1849	MATa ura3-52 his3Δ200 leu2Δ0 or Δ1 trp1Δ63 met15Δ0 lys2-128∂ gal10Δ56 RPB3::TAP::KlacTRP1 ssl2∆::hph
CKY2337	pRS315 ssl2 I383T	pCK1849	MATa ura3-52 his3Δ200 leu2Δ0 or Δ1 trp1Δ63 met15Δ0 lys2-128∂ gal10Δ56 RPB3::TAP::KlacTRP1 ssl2∆::hph
CKY2338	pRS315 ssl2 T402I	pCK1850	MATa ura3-52 his3Δ200 leu2Δ0 or Δ1 trp1Δ63 met15Δ0 lys2-128∂ gal10Δ56 RPB3::TAP::KlacTRP1 imd2Δ::HIS3 ssl2∆::hph
CKY2339	pRS315 ssl2 T402I	pCK1850	MATa ura3-52 his3Δ200 leu2Δ0 or Δ1 trp1Δ63 met15Δ0 lys2-128∂ gal10Δ56 RPB3::TAP::KlacTRP1 imd2Δ::HIS3 ssl2∆::hph
CKY2340	pRS315 ssl2 T402I	pCK1850	MATa ura3-52 his3Δ200 leu2Δ0 or Δ1 trp1Δ63 met15Δ0 lys2-128∂ gal10Δ56 RPB3::TAP::KlacTRP1 ssl2∆::hph
CKY2341	pRS315 ssl2 T402I	pCK1850	MATa ura3-52 his3Δ200 leu2Δ0 or Δ1 trp1Δ63 met15Δ0 lys2-128∂ gal10Δ56 RPB3::TAP::KlacTRP1 ssl2∆::hph
CKY2342	pRS315 ssl2 K443E	pCK1851	MATa ura3-52 his3Δ200 leu2Δ0 or Δ1 trp1Δ63 met15Δ0 lys2-128∂ gal10Δ56 RPB3::TAP::KlacTRP1 imd2Δ::HIS3 ssl2∆::hph
CKY2343	pRS315 ssl2 K443E	pCK1851	MATa ura3-52 his3Δ200 leu2Δ0 or Δ1 trp1Δ63 met15Δ0 lys2-128∂ gal10Δ56 RPB3::TAP::KlacTRP1 imd2Δ::HIS3 ssl2∆::hph
CKY2344	pRS315 ssl2 K443E	pCK1851	MATa ura3-52 his3Δ200 leu2Δ0 or Δ1 trp1Δ63 met15Δ0 lys2-128∂ gal10Δ56 RPB3::TAP::KlacTRP1 ssl2∆::hph
CKY2345	pRS315 ssl2 K443E	pCK1851	MATa ura3-52 his3Δ200 leu2Δ0 or Δ1 trp1Δ63 met15Δ0 lys2-128∂ gal10Δ56 RPB3::TAP::KlacTRP1 ssl2∆::hph
CKY2346	pRS315 ssl2 V473D	pCK1852	MATa ura3-52 his3Δ200 leu2Δ0 or Δ1 trp1Δ63 met15Δ0 lys2-128∂ gal10Δ56 RPB3::TAP::KlacTRP1 imd2Δ::HIS3 ssl2∆::hph
CKY2347	pRS315 ssl2 V473D	pCK1852	MATa ura3-52 his3Δ200 leu2Δ0 or Δ1 trp1Δ63 met15Δ0 lys2-128∂ gal10Δ56 RPB3::TAP::KlacTRP1 imd2Δ::HIS3 ssl2∆::hph
CKY2348	pRS315 ssl2 V473D	pCK1852	MATa ura3-52 his3Δ200 leu2Δ0 or Δ1 trp1Δ63 met15Δ0 lys2-128∂ gal10Δ56 RPB3::TAP::KlacTRP1 ssl2∆::hph
CKY2349	pRS315 ssl2 V473D	pCK1852	MATa ura3-52 his3Δ200 leu2Δ0 or Δ1 trp1Δ63 met15Δ0 lys2-128∂ gal10Δ56 RPB3::TAP::KlacTRP1 ssl2∆::hph
CKY2350	pRS315 ssl2 F498L	pCK1853	MATa ura3-52 his3Δ200 leu2Δ0 or Δ1 trp1Δ63 met15Δ0 lys2-128∂ gal10Δ56 RPB3::TAP::KlacTRP1 imd2Δ::HIS3 ssl2∆::hph
CKY2351	pRS315 ssl2 F498L	pCK1853	MATa ura3-52 his3Δ200 leu2Δ0 or Δ1 trp1Δ63 met15Δ0 lys2-128∂ gal10Δ56 RPB3::TAP::KlacTRP1 imd2Δ::HIS3 ssl2∆::hph
CKY2352	pRS315 ssl2 F498L	pCK1853	MATa ura3-52 his3Δ200 leu2Δ0 or Δ1 trp1Δ63 met15Δ0 lys2-128∂ gal10Δ56 RPB3::TAP::KlacTRP1 ssl2∆::hph
CKY2353	pRS315 ssl2 F498L	pCK1853	MATa ura3-52 his3Δ200 leu2Δ0 or Δ1 trp1Δ63 met15Δ0 lys2-128∂ gal10Δ56 RPB3::TAP::KlacTRP1 ssl2∆::hph
CKY2354	pRS315 ssl2 D522V	pCK1854	MATa ura3-52 his3Δ200 leu2Δ0 or Δ1 trp1Δ63 met15Δ0 lys2-128∂ gal10Δ56 RPB3::TAP::KlacTRP1 imd2Δ::HIS3 ssl2∆::hph
CKY2355	pRS315 ssl2 D522V	pCK1854	MATa ura3-52 his3Δ200 leu2Δ0 or Δ1 trp1Δ63 met15Δ0 lys2-128∂ gal10Δ56 RPB3::TAP::KlacTRP1 imd2Δ::HIS3 ssl2∆::hph
CKY2356	pRS315 ssl2 D522V	pCK1854	MATa ura3-52 his3Δ200 leu2Δ0 or Δ1 trp1Δ63 met15Δ0 lys2-128∂ gal10Δ56 RPB3::TAP::KlacTRP1 ssl2∆::hph
CKY2357	pRS315 ssl2 D522V	pCK1854	MATa ura3-52 his3Δ200 leu2Δ0 or Δ1 trp1Δ63 met15Δ0 lys2-128∂ gal10Δ56 RPB3::TAP::KlacTRP1 ssl2∆::hph
CKY2358	pRS315 ssl2 K523N	pCK1855	MATa ura3-52 his3Δ200 leu2Δ0 or Δ1 trp1Δ63 met15Δ0 lys2-128∂ gal10Δ56 RPB3::TAP::KlacTRP1 imd2Δ::HIS3 ssl2∆::hph
CKY2359	pRS315 ssl2 K523N	pCK1855	MATa ura3-52 his3Δ200 leu2Δ0 or Δ1 trp1Δ63 met15Δ0 lys2-128∂ gal10Δ56 RPB3::TAP::KlacTRP1 imd2Δ::HIS3 ssl2∆::hph
CKY2360	pRS315 ssl2 K523N	pCK1855	MATa ura3-52 his3Δ200 leu2Δ0 or Δ1 trp1Δ63 met15Δ0 lys2-128∂ gal10Δ56 RPB3::TAP::KlacTRP1 ssl2∆::hph
CKY2361	pRS315 ssl2 K523N	pCK1855	MATa ura3-52 his3Δ200 leu2Δ0 or Δ1 trp1Δ63 met15Δ0 lys2-128∂ gal10Δ56 RPB3::TAP::KlacTRP1 ssl2∆::hph
CKY2362	pRS315 ssl2 N528I	pCK1856	MATa ura3-52 his3Δ200 leu2Δ0 or Δ1 trp1Δ63 met15Δ0 lys2-128∂ gal10Δ56 RPB3::TAP::KlacTRP1 imd2Δ::HIS3 ssl2∆::hph
CKY2363	pRS315 ssl2 N528I	pCK1856	MATa ura3-52 his3Δ200 leu2Δ0 or Δ1 trp1Δ63 met15Δ0 lys2-128∂ gal10Δ56 RPB3::TAP::KlacTRP1 imd2Δ::HIS3 ssl2∆::hph
CKY2364	pRS315 ssl2 N528I	pCK1856	MATa ura3-52 his3Δ200 leu2Δ0 or Δ1 trp1Δ63 met15Δ0 lys2-128∂ gal10Δ56 RPB3::TAP::KlacTRP1 ssl2∆::hph
CKY2365	pRS315 ssl2 N528I	pCK1856	MATa ura3-52 his3Δ200 leu2Δ0 or Δ1 trp1Δ63 met15Δ0 lys2-128∂ gal10Δ56 RPB3::TAP::KlacTRP1 ssl2∆::hph
CKY2366	pRS315 ssl2 F529L	pCK1857	MATa ura3-52 his3Δ200 leu2Δ0 or Δ1 trp1Δ63 met15Δ0 lys2-128∂ gal10Δ56 RPB3::TAP::KlacTRP1 imd2Δ::HIS3 ssl2∆::hph
CKY2367	pRS315 ssl2 F529L	pCK1857	MATa ura3-52 his3Δ200 leu2Δ0 or Δ1 trp1Δ63 met15Δ0 lys2-128∂ gal10Δ56 RPB3::TAP::KlacTRP1 imd2Δ::HIS3 ssl2∆::hph
CKY2368	pRS315 ssl2 F529L	pCK1857	MATa ura3-52 his3Δ200 leu2Δ0 or Δ1 trp1Δ63 met15Δ0 lys2-128∂ gal10Δ56 RPB3::TAP::KlacTRP1 ssl2∆::hph
CKY2369	pRS315 ssl2 F529L	pCK1857	MATa ura3-52 his3Δ200 leu2Δ0 or Δ1 trp1Δ63 met15Δ0 lys2-128∂ gal10Δ56 RPB3::TAP::KlacTRP1 ssl2∆::hph
CKY2370	pRS315 ssl2 E537G	pCK1858	MATa ura3-52 his3Δ200 leu2Δ0 or Δ1 trp1Δ63 met15Δ0 lys2-128∂ gal10Δ56 RPB3::TAP::KlacTRP1 imd2Δ::HIS3 ssl2∆::hph
CKY2371	pRS315 ssl2 E537G	pCK1858	MATa ura3-52 his3Δ200 leu2Δ0 or Δ1 trp1Δ63 met15Δ0 lys2-128∂ gal10Δ56 RPB3::TAP::KlacTRP1 imd2Δ::HIS3 ssl2∆::hph
CKY2372	pRS315 ssl2 E537G	pCK1858	MATa ura3-52 his3Δ200 leu2Δ0 or Δ1 trp1Δ63 met15Δ0 lys2-128∂ gal10Δ56 RPB3::TAP::KlacTRP1 ssl2∆::hph
CKY2373	pRS315 ssl2 E537G	pCK1858	MATa ura3-52 his3Δ200 leu2Δ0 or Δ1 trp1Δ63 met15Δ0 lys2-128∂ gal10Δ56 RPB3::TAP::KlacTRP1 ssl2∆::hph
CKY2374	pRS315 ssl2 W558R	pCK1859	MATa ura3-52 his3Δ200 leu2Δ0 or Δ1 trp1Δ63 met15Δ0 lys2-128∂ gal10Δ56 RPB3::TAP::KlacTRP1 imd2Δ::HIS3 ssl2∆::hph
CKY2375	pRS315 ssl2 W558R	pCK1859	MATa ura3-52 his3Δ200 leu2Δ0 or Δ1 trp1Δ63 met15Δ0 lys2-128∂ gal10Δ56 RPB3::TAP::KlacTRP1 imd2Δ::HIS3 ssl2∆::hph
CKY2376	pRS315 ssl2 W558R	pCK1859	MATa ura3-52 his3Δ200 leu2Δ0 or Δ1 trp1Δ63 met15Δ0 lys2-128∂ gal10Δ56 RPB3::TAP::KlacTRP1 ssl2∆::hph
CKY2377	pRS315 ssl2 W558R	pCK1859	MATa ura3-52 his3Δ200 leu2Δ0 or Δ1 trp1Δ63 met15Δ0 lys2-128∂ gal10Δ56 RPB3::TAP::KlacTRP1 ssl2∆::hph
CKY2378	pRS315 ssl2 D610A	pCK1860	MATa ura3-52 his3Δ200 leu2Δ0 or Δ1 trp1Δ63 met15Δ0 lys2-128∂ gal10Δ56 RPB3::TAP::KlacTRP1 imd2Δ::HIS3 ssl2∆::hph
CKY2379	pRS315 ssl2 D610A	pCK1860	MATa ura3-52 his3Δ200 leu2Δ0 or Δ1 trp1Δ63 met15Δ0 lys2-128∂ gal10Δ56 RPB3::TAP::KlacTRP1 imd2Δ::HIS3 ssl2∆::hph
CKY2380	pRS315 ssl2 D610A	pCK1860	MATa ura3-52 his3Δ200 leu2Δ0 or Δ1 trp1Δ63 met15Δ0 lys2-128∂ gal10Δ56 RPB3::TAP::KlacTRP1 ssl2∆::hph
CKY2381	pRS315 ssl2 D610A	pCK1860	MATa ura3-52 his3Δ200 leu2Δ0 or Δ1 trp1Δ63 met15Δ0 lys2-128∂ gal10Δ56 RPB3::TAP::KlacTRP1 ssl2∆::hph
CKY2382	pRS315 ssl2 R636C	pCK1861	MATa ura3-52 his3Δ200 leu2Δ0 or Δ1 trp1Δ63 met15Δ0 lys2-128∂ gal10Δ56 RPB3::TAP::KlacTRP1 imd2Δ::HIS3 ssl2∆::hph
CKY2383	pRS315 ssl2 R636C	pCK1861	MATa ura3-52 his3Δ200 leu2Δ0 or Δ1 trp1Δ63 met15Δ0 lys2-128∂ gal10Δ56 RPB3::TAP::KlacTRP1 imd2Δ::HIS3 ssl2∆::hph
CKY2384	pRS315 ssl2 R636C	pCK1861	MATa ura3-52 his3Δ200 leu2Δ0 or Δ1 trp1Δ63 met15Δ0 lys2-128∂ gal10Δ56 RPB3::TAP::KlacTRP1 ssl2∆::hph
CKY2385	pRS315 ssl2 R636C	pCK1861	MATa ura3-52 his3Δ200 leu2Δ0 or Δ1 trp1Δ63 met15Δ0 lys2-128∂ gal10Δ56 RPB3::TAP::KlacTRP1 ssl2∆::hph
CKY2386	pRS315 ssl2 N642D	pCK1862	MATa ura3-52 his3Δ200 leu2Δ0 or Δ1 trp1Δ63 met15Δ0 lys2-128∂ gal10Δ56 RPB3::TAP::KlacTRP1 imd2Δ::HIS3 ssl2∆::hph
CKY2387	pRS315 ssl2 N642D	pCK1862	MATa ura3-52 his3Δ200 leu2Δ0 or Δ1 trp1Δ63 met15Δ0 lys2-128∂ gal10Δ56 RPB3::TAP::KlacTRP1 imd2Δ::HIS3 ssl2∆::hph
CKY2388	pRS315 ssl2 N642D	pCK1862	MATa ura3-52 his3Δ200 leu2Δ0 or Δ1 trp1Δ63 met15Δ0 lys2-128∂ gal10Δ56 RPB3::TAP::KlacTRP1 ssl2∆::hph
CKY2389	pRS315 ssl2 N642D	pCK1862	MATa ura3-52 his3Δ200 leu2Δ0 or Δ1 trp1Δ63 met15Δ0 lys2-128∂ gal10Δ56 RPB3::TAP::KlacTRP1 ssl2∆::hph
CKY2390	pRS315 ssl2 L664S	pCK1863	MATa ura3-52 his3Δ200 leu2Δ0 or Δ1 trp1Δ63 met15Δ0 lys2-128∂ gal10Δ56 RPB3::TAP::KlacTRP1 imd2Δ::HIS3 ssl2∆::hph
CKY2391	pRS315 ssl2 L664S	pCK1863	MATa ura3-52 his3Δ200 leu2Δ0 or Δ1 trp1Δ63 met15Δ0 lys2-128∂ gal10Δ56 RPB3::TAP::KlacTRP1 imd2Δ::HIS3 ssl2∆::hph
CKY2392	pRS315 ssl2 L664S	pCK1863	MATa ura3-52 his3Δ200 leu2Δ0 or Δ1 trp1Δ63 met15Δ0 lys2-128∂ gal10Δ56 RPB3::TAP::KlacTRP1 ssl2∆::hph
CKY2393	pRS315 ssl2 L664S	pCK1863	MATa ura3-52 his3Δ200 leu2Δ0 or Δ1 trp1Δ63 met15Δ0 lys2-128∂ gal10Δ56 RPB3::TAP::KlacTRP1 ssl2∆::hph
CKY2394	pRS315 ssl2 Q672R	pCK1864	MATa ura3-52 his3Δ200 leu2Δ0 or Δ1 trp1Δ63 met15Δ0 lys2-128∂ gal10Δ56 RPB3::TAP::KlacTRP1 imd2Δ::HIS3 ssl2∆::hph
CKY2395	pRS315 ssl2 Q672R	pCK1864	MATa ura3-52 his3Δ200 leu2Δ0 or Δ1 trp1Δ63 met15Δ0 lys2-128∂ gal10Δ56 RPB3::TAP::KlacTRP1 imd2Δ::HIS3 ssl2∆::hph
CKY2396	pRS315 ssl2 Q672R	pCK1864	MATa ura3-52 his3Δ200 leu2Δ0 or Δ1 trp1Δ63 met15Δ0 lys2-128∂ gal10Δ56 RPB3::TAP::KlacTRP1 ssl2∆::hph
CKY2397	pRS315 ssl2 Q672R	pCK1864	MATa ura3-52 his3Δ200 leu2Δ0 or Δ1 trp1Δ63 met15Δ0 lys2-128∂ gal10Δ56 RPB3::TAP::KlacTRP1 ssl2∆::hph
CKY2398	pRS315 ssl2 E715G	pCK1865	MATa ura3-52 his3Δ200 leu2Δ0 or Δ1 trp1Δ63 met15Δ0 lys2-128∂ gal10Δ56 RPB3::TAP::KlacTRP1 imd2Δ::HIS3 ssl2∆::hph
CKY2399	pRS315 ssl2 E715G	pCK1865	MATa ura3-52 his3Δ200 leu2Δ0 or Δ1 trp1Δ63 met15Δ0 lys2-128∂ gal10Δ56 RPB3::TAP::KlacTRP1 imd2Δ::HIS3 ssl2∆::hph
CKY2400	pRS315 ssl2 E715G	pCK1865	MATa ura3-52 his3Δ200 leu2Δ0 or Δ1 trp1Δ63 met15Δ0 lys2-128∂ gal10Δ56 RPB3::TAP::KlacTRP1 ssl2∆::hph
CKY2401	pRS315 ssl2 E715G	pCK1865	MATa ura3-52 his3Δ200 leu2Δ0 or Δ1 trp1Δ63 met15Δ0 lys2-128∂ gal10Δ56 RPB3::TAP::KlacTRP1 ssl2∆::hph
CKY2402	pRS315 ssl2 S719P	pCK1866	MATa ura3-52 his3Δ200 leu2Δ0 or Δ1 trp1Δ63 met15Δ0 lys2-128∂ gal10Δ56 RPB3::TAP::KlacTRP1 imd2Δ::HIS3 ssl2∆::hph
CKY2403	pRS315 ssl2 S719P	pCK1866	MATa ura3-52 his3Δ200 leu2Δ0 or Δ1 trp1Δ63 met15Δ0 lys2-128∂ gal10Δ56 RPB3::TAP::KlacTRP1 imd2Δ::HIS3 ssl2∆::hph
CKY2404	pRS315 ssl2 S719P	pCK1866	MATa ura3-52 his3Δ200 leu2Δ0 or Δ1 trp1Δ63 met15Δ0 lys2-128∂ gal10Δ56 RPB3::TAP::KlacTRP1 ssl2∆::hph
CKY2405	pRS315 ssl2 S719P	pCK1866	MATa ura3-52 his3Δ200 leu2Δ0 or Δ1 trp1Δ63 met15Δ0 lys2-128∂ gal10Δ56 RPB3::TAP::KlacTRP1 ssl2∆::hph
CKY2406	pRS315 ssl2 L832*	pCK1867	MATa ura3-52 his3Δ200 leu2Δ0 or Δ1 trp1Δ63 met15Δ0 lys2-128∂ gal10Δ56 RPB3::TAP::KlacTRP1 imd2Δ::HIS3 ssl2∆::hph
CKY2407	pRS315 ssl2 L832*	pCK1867	MATa ura3-52 his3Δ200 leu2Δ0 or Δ1 trp1Δ63 met15Δ0 lys2-128∂ gal10Δ56 RPB3::TAP::KlacTRP1 imd2Δ::HIS3 ssl2∆::hph
CKY2408	pRS315 ssl2 L832*	pCK1867	MATa ura3-52 his3Δ200 leu2Δ0 or Δ1 trp1Δ63 met15Δ0 lys2-128∂ gal10Δ56 RPB3::TAP::KlacTRP1 ssl2∆::hph
CKY2409	pRS315 ssl2 L832*	pCK1867	MATa ura3-52 his3Δ200 leu2Δ0 or Δ1 trp1Δ63 met15Δ0 lys2-128∂ gal10Δ56 RPB3::TAP::KlacTRP1 ssl2∆::hph

## Sheet: 4_rpb1+ssl2
Strain number	Plasmid	Plasmid pCK	Genotype
CKY283	pRP112 RPB1 CEN URA3	pCK250	MATa ura3-52 his3∆200 leu2∆1 or ∆0 trp1∆63 met15∆0 lys2-128∂ gal10∆56 rpb1∆::CLONATMX RPB3::TAP::KlacTRP1
CKY285	pRP112 RPB1 CEN URA3	pCK250	MATa ura3-52 his3∆200 leu2∆1 or ∆0 trp1∆63 met15∆0 lys2-128∂ gal10∆55 rpb1∆::CLONATMX RPB3::TAP::KlacTRP1
CKY763	RPB1 CEN LEU2 T69 corrected	pCK859	MATa ura3-52 his3∆200 leu2∆1 or ∆0 trp1∆63 met15∆0 lys2-128∂ gal10∆56 rpb1∆::CLONATMX RPB3::TAP::KlacTRP1
CKY764	RPB1 CEN LEU2 T69 corrected	pCK859	MATa ura3-52 his3∆200 leu2∆1 or ∆0 trp1∆63 met15∆0 lys2-128∂ gal10∆56 rpb1∆::CLONATMX RPB3::TAP::KlacTRP1
CKY2545	pRP112 RPB1 CEN URA3	pCK250	MATa ura3-52 his3∆200 leu2∆1 or ∆0 trp1∆63 met15∆0 lys2-128∂ gal10∆56 rpb1∆::CLONATMX RPB3::TAP::KlacTRP1 imd2Δ::HIS3
CKY2546	pRP112 RPB1 CEN URA3	pCK250	MATa ura3-52 his3∆200 leu2∆1 or ∆0 trp1∆63 met15∆0 lys2-128∂ gal10∆56 rpb1∆::CLONATMX RPB3::TAP::KlacTRP1 imd2Δ::HIS3
CKY2547	pRP112 RPB1 CEN URA3	pCK250	MATa ura3-52 his3∆200 leu2∆1 or ∆0 trp1∆63 met15∆0 lys2-128∂ gal10∆56 rpb1∆::CLONATMX RPB3::TAP::KlacTRP1 imd2Δ::HIS3
CKY2548	pRP112 RPB1 CEN URA3	pCK250	MATa ura3-52 his3∆200 leu2∆1 or ∆0 trp1∆63 met15∆0 lys2-128∂ gal10∆56 rpb1∆::CLONATMX RPB3::TAP::KlacTRP1 imd2Δ::HIS3
CKY2549	RPB1 CEN LEU2 T69 corrected	pCK859	MATa ura3-52 his3∆200 leu2∆1 or ∆0 trp1∆63 met15∆0 lys2-128∂ gal10∆56 rpb1∆::CLONATMX RPB3::TAP::KlacTRP1 imd2Δ::HIS3
CKY2550	RPB1 CEN LEU2 T69 corrected	pCK859	MATa ura3-52 his3∆200 leu2∆1 or ∆0 trp1∆63 met15∆0 lys2-128∂ gal10∆56 rpb1∆::CLONATMX RPB3::TAP::KlacTRP1 imd2Δ::HIS3
CKY2551	RPB1 CEN LEU2 T69 corrected	pCK859	MATa ura3-52 his3∆200 leu2∆1 or ∆0 trp1∆63 met15∆0 lys2-128∂ gal10∆56 rpb1∆::CLONATMX RPB3::TAP::KlacTRP1 imd2Δ::HIS3
CKY2552	RPB1 CEN LEU2 T69 corrected	pCK859	MATa ura3-52 his3∆200 leu2∆1 or ∆0 trp1∆63 met15∆0 lys2-128∂ gal10∆56 rpb1∆::CLONATMX RPB3::TAP::KlacTRP1 imd2Δ::HIS3
CKY2611	RPB1 CEN LEU2 T69 corrected	pCK859	MATa ura3-52 his3∆200 leu2∆1 or ∆0 trp1∆63 met15∆0 lys2-128∂ gal10∆56 rpb1∆::CLONATMX RPB3::TAP::KlacTRP1 ssl2 N230I
CKY2612	RPB1 CEN LEU2 T69 corrected	pCK859	MATa ura3-52 his3∆200 leu2∆1 or ∆0 trp1∆63 met15∆0 lys2-128∂ gal10∆56 rpb1∆::CLONATMX RPB3::TAP::KlacTRP1 ssl2 N230I
CKY2613	RPB1 CEN LEU2 T69 corrected	pCK859	MATa ura3-52 his3∆200 leu2∆1 or ∆0 trp1∆63 met15∆0 lys2-128∂ gal10∆56 rpb1∆::CLONATMX RPB3::TAP::KlacTRP1 ssl2 N230D
CKY2614	RPB1 CEN LEU2 T69 corrected	pCK859	MATa ura3-52 his3∆200 leu2∆1 or ∆0 trp1∆63 met15∆0 lys2-128∂ gal10∆56 rpb1∆::CLONATMX RPB3::TAP::KlacTRP1 ssl2 N230D
CKY2627	RPB1 CEN LEU2 T69 corrected	pCK859	MATa ura3-52 his3∆200 leu2∆1 or ∆0 trp1∆63 met15∆0 lys2-128∂ gal10∆56 rpb1∆::CLONATMX RPB3::TAP::KlacTRP1 imd2Δ::HIS3 ssl2 N230I
CKY2628	RPB1 CEN LEU2 T69 corrected	pCK859	MATa ura3-52 his3∆200 leu2∆1 or ∆0 trp1∆63 met15∆0 lys2-128∂ gal10∆56 rpb1∆::CLONATMX RPB3::TAP::KlacTRP1 imd2Δ::HIS3 ssl2 N230I
CKY2629	RPB1 CEN LEU2 T69 corrected	pCK859	MATa ura3-52 his3∆200 leu2∆1 or ∆0 trp1∆63 met15∆0 lys2-128∂ gal10∆56 rpb1∆::CLONATMX RPB3::TAP::KlacTRP1 imd2Δ::HIS3 ssl2 N230D
CKY2630	RPB1 CEN LEU2 T69 corrected	pCK859	MATa ura3-52 his3∆200 leu2∆1 or ∆0 trp1∆63 met15∆0 lys2-128∂ gal10∆56 rpb1∆::CLONATMX RPB3::TAP::KlacTRP1 imd2Δ::HIS3 ssl2 N230D
CKY2643	pRP112 URA3 CEN ARS RPB1	pCK250	MATa ura3-52 his3∆200 leu2∆1 or ∆0 trp1∆63 met15∆0 lys2-128∂ gal10∆56 rpb1∆::CLONATMX RPB3::TAP::KlacTRP1 imd2Δ::HIS3 ssl2 N230I
CKY2644	pRP112 URA3 CEN ARS RPB1	pCK250	MATa ura3-52 his3∆200 leu2∆1 or ∆0 trp1∆63 met15∆0 lys2-128∂ gal10∆56 rpb1∆::CLONATMX RPB3::TAP::KlacTRP1 imd2Δ::HIS3 ssl2 N230I
CKY2834	pRP112 URA3 CEN ARS RPB1	pCK250	MATa ura3-52 his3∆200 leu2∆1 or ∆0 trp1∆63 met15∆0 lys2-128∂ gal10∆56 rpb1∆::CLONATMX RPB3::TAP::KlacTRP1 ssl2 N230I
CKY2835	pRP112 URA3 CEN ARS RPB1	pCK250	MATa ura3-52 his3∆200 leu2∆1 or ∆0 trp1∆63 met15∆0 lys2-128∂ gal10∆56 rpb1∆::CLONATMX RPB3::TAP::KlacTRP1 ssl2 N230I
CKY2836	pRP112 URA3 CEN ARS RPB1	pCK250	MATa ura3-52 his3∆200 leu2∆1 or ∆0 trp1∆63 met15∆0 lys2-128∂ gal10∆56 rpb1∆::CLONATMX RPB3::TAP::KlacTRP1 ssl2 N230D
CKY2837	pRP112 URA3 CEN ARS RPB1	pCK250	MATa ura3-52 his3∆200 leu2∆1 or ∆0 trp1∆63 met15∆0 lys2-128∂ gal10∆56 rpb1∆::CLONATMX RPB3::TAP::KlacTRP1 ssl2 N230D
CKY2840	pRP112 URA3 CEN ARS RPB1	pCK250	MATa ura3-52 his3∆200 leu2∆1 or ∆0 trp1∆63 met15∆0 lys2-128∂ gal10∆56 rpb1∆::CLONATMX RPB3::TAP::KlacTRP1 imd2Δ::HIS3 ssl2 N230D
CKY2841	pRP112 URA3 CEN ARS RPB1	pCK250	MATa ura3-52 his3∆200 leu2∆1 or ∆0 trp1∆63 met15∆0 lys2-128∂ gal10∆56 rpb1∆::CLONATMX RPB3::TAP::KlacTRP1 imd2Δ::HIS3 ssl2 N230D
CKY2950	RPB1 CEN LEU2 T69 corrected	pCK859	MATa ura3-52 his3∆200 leu2∆1 or ∆0 trp1∆63 met15∆0 lys2-128∂ gal10∆56 rpb1∆::CLONATMX RPB3::TAP::KlacTRP1
CKY2951	RPB1 CEN LEU2 T69 corrected	pCK859	MATa ura3-52 his3∆200 leu2∆1 or ∆0 trp1∆63 met15∆0 lys2-128∂ gal10∆56 rpb1∆::CLONATMX RPB3::TAP::KlacTRP1
CKY2958	pRS315H3alt-rpb1* rpb1 11-207 (L1101S) T69 corrected	pCK864	MATa ura3-52 his3∆200 leu2∆1 or ∆0 trp1∆63 met15∆0 lys2-128∂ gal10∆56 rpb1∆::CLONATMX RPB3::TAP::KlacTRP1
CKY2959	pRS315H3alt-rpb1* rpb1 11-207 (L1101S) T69 corrected	pCK864	MATa ura3-52 his3∆200 leu2∆1 or ∆0 trp1∆63 met15∆0 lys2-128∂ gal10∆56 rpb1∆::CLONATMX RPB3::TAP::KlacTRP1
CKY2960	pRS315H3alt-RPB1* rpb1 10-110 (G1097D) T69 corrected	pCK867	MATa ura3-52 his3∆200 leu2∆1 or ∆0 trp1∆63 met15∆0 lys2-128∂ gal10∆56 rpb1∆::CLONATMX RPB3::TAP::KlacTRP1
CKY2961	pRS315H3alt-RPB1* rpb1 10-110 (G1097D) T69 corrected	pCK867	MATa ura3-52 his3∆200 leu2∆1 or ∆0 trp1∆63 met15∆0 lys2-128∂ gal10∆56 rpb1∆::CLONATMX RPB3::TAP::KlacTRP1
CKY2962	pRS315H3alt-rpb1*XmaI H1085Y T69 corrected	pCK870	MATa ura3-52 his3∆200 leu2∆1 or ∆0 trp1∆63 met15∆0 lys2-128∂ gal10∆56 rpb1∆::CLONATMX RPB3::TAP::KlacTRP1
CKY2963	pRS315H3alt-rpb1*XmaI H1085Y T69 corrected	pCK870	MATa ura3-52 his3∆200 leu2∆1 or ∆0 trp1∆63 met15∆0 lys2-128∂ gal10∆56 rpb1∆::CLONATMX RPB3::TAP::KlacTRP1
CKY2964	pRS315H3alt-rpb1* 10-88 (F1086S) T69 corrected	pCK871	MATa ura3-52 his3∆200 leu2∆1 or ∆0 trp1∆63 met15∆0 lys2-128∂ gal10∆56 rpb1∆::CLONATMX RPB3::TAP::KlacTRP1
CKY2965	pRS315H3alt-rpb1* 10-88 (F1086S) T69 corrected	pCK871	MATa ura3-52 his3∆200 leu2∆1 or ∆0 trp1∆63 met15∆0 lys2-128∂ gal10∆56 rpb1∆::CLONATMX RPB3::TAP::KlacTRP1
CKY2968	pRS315H3alt-RPB1* XmaI 1122-1123 H1085Q T69 corrected	pCK887	MATa ura3-52 his3∆200 leu2∆1 or ∆0 trp1∆63 met15∆0 lys2-128∂ gal10∆56 rpb1∆::CLONATMX RPB3::TAP::KlacTRP1
CKY2969	pRS315H3alt-RPB1* XmaI 1122-1123 H1085Q T69 corrected	pCK887	MATa ura3-52 his3∆200 leu2∆1 or ∆0 trp1∆63 met15∆0 lys2-128∂ gal10∆56 rpb1∆::CLONATMX RPB3::TAP::KlacTRP1
CKY2970	pRS315H3alt-RPB1* XmaI 1122-1123 F1084I corrected	pCK955	MATa ura3-52 his3∆200 leu2∆1 or ∆0 trp1∆63 met15∆0 lys2-128∂ gal10∆56 rpb1∆::CLONATMX RPB3::TAP::KlacTRP1
CKY2971	pRS315H3alt-RPB1* XmaI 1122-1123 F1084I corrected	pCK955	MATa ura3-52 his3∆200 leu2∆1 or ∆0 trp1∆63 met15∆0 lys2-128∂ gal10∆56 rpb1∆::CLONATMX RPB3::TAP::KlacTRP1
CKY2972	pRS315H3alt-rpb1* E1103G T69 corrected	pCK960	MATa ura3-52 his3∆200 leu2∆1 or ∆0 trp1∆63 met15∆0 lys2-128∂ gal10∆56 rpb1∆::CLONATMX RPB3::TAP::KlacTRP1
CKY2973	pRS315H3alt-rpb1* E1103G T69 corrected	pCK960	MATa ura3-52 his3∆200 leu2∆1 or ∆0 trp1∆63 met15∆0 lys2-128∂ gal10∆56 rpb1∆::CLONATMX RPB3::TAP::KlacTRP1
CKY2974	pRS315H3alt-rpb1* XmaI 1122-1123 N1082S corrected T69 corrected USE	pCK1340	MATa ura3-52 his3∆200 leu2∆1 or ∆0 trp1∆63 met15∆0 lys2-128∂ gal10∆56 rpb1∆::CLONATMX RPB3::TAP::KlacTRP1
CKY2975	pRS315H3alt-rpb1* XmaI 1122-1123 N1082S corrected T69 corrected USE	pCK1340	MATa ura3-52 his3∆200 leu2∆1 or ∆0 trp1∆63 met15∆0 lys2-128∂ gal10∆56 rpb1∆::CLONATMX RPB3::TAP::KlacTRP1
CKY2982	RPB1 CEN LEU2 T69 corrected	pCK859	MATa ura3-52 his3∆200 leu2∆1 or ∆0 trp1∆63 met15∆0 lys2-128∂ gal10∆56 rpb1∆::CLONATMX RPB3::TAP::KlacTRP1 imd2Δ::HIS3
CKY2983	RPB1 CEN LEU2 T69 corrected	pCK859	MATa ura3-52 his3∆200 leu2∆1 or ∆0 trp1∆63 met15∆0 lys2-128∂ gal10∆56 rpb1∆::CLONATMX RPB3::TAP::KlacTRP1 imd2Δ::HIS3
CKY2990	pRS315H3alt-rpb1* rpb1 11-207 (L1101S) T69 corrected	pCK864	MATa ura3-52 his3∆200 leu2∆1 or ∆0 trp1∆63 met15∆0 lys2-128∂ gal10∆56 rpb1∆::CLONATMX RPB3::TAP::KlacTRP1 imd2Δ::HIS3
CKY2991	pRS315H3alt-rpb1* rpb1 11-207 (L1101S) T69 corrected	pCK864	MATa ura3-52 his3∆200 leu2∆1 or ∆0 trp1∆63 met15∆0 lys2-128∂ gal10∆56 rpb1∆::CLONATMX RPB3::TAP::KlacTRP1 imd2Δ::HIS3
CKY2992	pRS315H3alt-RPB1* rpb1 10-110 (G1097D) T69 corrected	pCK867	MATa ura3-52 his3∆200 leu2∆1 or ∆0 trp1∆63 met15∆0 lys2-128∂ gal10∆56 rpb1∆::CLONATMX RPB3::TAP::KlacTRP1 imd2Δ::HIS3
CKY2993	pRS315H3alt-RPB1* rpb1 10-110 (G1097D) T69 corrected	pCK867	MATa ura3-52 his3∆200 leu2∆1 or ∆0 trp1∆63 met15∆0 lys2-128∂ gal10∆56 rpb1∆::CLONATMX RPB3::TAP::KlacTRP1 imd2Δ::HIS3
CKY2994	pRS315H3alt-rpb1*XmaI H1085Y T69 corrected	pCK870	MATa ura3-52 his3∆200 leu2∆1 or ∆0 trp1∆63 met15∆0 lys2-128∂ gal10∆56 rpb1∆::CLONATMX RPB3::TAP::KlacTRP1 imd2Δ::HIS3
CKY2995	pRS315H3alt-rpb1*XmaI H1085Y T69 corrected	pCK870	MATa ura3-52 his3∆200 leu2∆1 or ∆0 trp1∆63 met15∆0 lys2-128∂ gal10∆56 rpb1∆::CLONATMX RPB3::TAP::KlacTRP1 imd2Δ::HIS3
CKY2996	pRS315H3alt-rpb1* 10-88 (F1086S) T69 corrected	pCK871	MATa ura3-52 his3∆200 leu2∆1 or ∆0 trp1∆63 met15∆0 lys2-128∂ gal10∆56 rpb1∆::CLONATMX RPB3::TAP::KlacTRP1 imd2Δ::HIS3
CKY2997	pRS315H3alt-rpb1* 10-88 (F1086S) T69 corrected	pCK871	MATa ura3-52 his3∆200 leu2∆1 or ∆0 trp1∆63 met15∆0 lys2-128∂ gal10∆56 rpb1∆::CLONATMX RPB3::TAP::KlacTRP1 imd2Δ::HIS3
CKY3000	pRS315H3alt-RPB1* XmaI 1122-1123 H1085Q T69 corrected	pCK887	MATa ura3-52 his3∆200 leu2∆1 or ∆0 trp1∆63 met15∆0 lys2-128∂ gal10∆56 rpb1∆::CLONATMX RPB3::TAP::KlacTRP1 imd2Δ::HIS3
CKY3001	pRS315H3alt-RPB1* XmaI 1122-1123 H1085Q T69 corrected	pCK887	MATa ura3-52 his3∆200 leu2∆1 or ∆0 trp1∆63 met15∆0 lys2-128∂ gal10∆56 rpb1∆::CLONATMX RPB3::TAP::KlacTRP1 imd2Δ::HIS3
CKY3002	pRS315H3alt-RPB1* XmaI 1122-1123 F1084I corrected	pCK955	MATa ura3-52 his3∆200 leu2∆1 or ∆0 trp1∆63 met15∆0 lys2-128∂ gal10∆56 rpb1∆::CLONATMX RPB3::TAP::KlacTRP1 imd2Δ::HIS3
CKY3003	pRS315H3alt-RPB1* XmaI 1122-1123 F1084I corrected	pCK955	MATa ura3-52 his3∆200 leu2∆1 or ∆0 trp1∆63 met15∆0 lys2-128∂ gal10∆56 rpb1∆::CLONATMX RPB3::TAP::KlacTRP1 imd2Δ::HIS3
CKY3004	pRS315H3alt-rpb1* E1103G T69 corrected	pCK960	MATa ura3-52 his3∆200 leu2∆1 or ∆0 trp1∆63 met15∆0 lys2-128∂ gal10∆56 rpb1∆::CLONATMX RPB3::TAP::KlacTRP1 imd2Δ::HIS3
CKY3005	pRS315H3alt-rpb1* E1103G T69 corrected	pCK960	MATa ura3-52 his3∆200 leu2∆1 or ∆0 trp1∆63 met15∆0 lys2-128∂ gal10∆56 rpb1∆::CLONATMX RPB3::TAP::KlacTRP1 imd2Δ::HIS3
CKY3006	pRS315H3alt-rpb1* XmaI 1122-1123 N1082S corrected T69 corrected USE	pCK1340	MATa ura3-52 his3∆200 leu2∆1 or ∆0 trp1∆63 met15∆0 lys2-128∂ gal10∆56 rpb1∆::CLONATMX RPB3::TAP::KlacTRP1 imd2Δ::HIS3
CKY3007	pRS315H3alt-rpb1* XmaI 1122-1123 N1082S corrected T69 corrected USE	pCK1340	MATa ura3-52 his3∆200 leu2∆1 or ∆0 trp1∆63 met15∆0 lys2-128∂ gal10∆56 rpb1∆::CLONATMX RPB3::TAP::KlacTRP1 imd2Δ::HIS3
CKY3014	RPB1 CEN LEU2 T69 corrected	pCK859	MATa ura3-52 his3∆200 leu2∆1 or ∆0 trp1∆63 met15∆0 lys2-128∂ gal10∆56 rpb1∆::CLONATMX RPB3::TAP::KlacTRP1 ssl2 N230I
CKY3015	RPB1 CEN LEU2 T69 corrected	pCK859	MATa ura3-52 his3∆200 leu2∆1 or ∆0 trp1∆63 met15∆0 lys2-128∂ gal10∆56 rpb1∆::CLONATMX RPB3::TAP::KlacTRP1 ssl2 N230I
CKY3020	pRS315H3alt-rpb1* rpb1 11-207 (L1101S) T69 corrected	pCK864	MATa ura3-52 his3∆200 leu2∆1 or ∆0 trp1∆63 met15∆0 lys2-128∂ gal10∆56 rpb1∆::CLONATMX RPB3::TAP::KlacTRP1 ssl2 N230I
CKY3021	pRS315H3alt-rpb1* rpb1 11-207 (L1101S) T69 corrected	pCK864	MATa ura3-52 his3∆200 leu2∆1 or ∆0 trp1∆63 met15∆0 lys2-128∂ gal10∆56 rpb1∆::CLONATMX RPB3::TAP::KlacTRP1 ssl2 N230I
CKY3022	pRS315H3alt-RPB1* rpb1 10-110 (G1097D) T69 corrected	pCK867	MATa ura3-52 his3∆200 leu2∆1 or ∆0 trp1∆63 met15∆0 lys2-128∂ gal10∆56 rpb1∆::CLONATMX RPB3::TAP::KlacTRP1 ssl2 N230I
CKY3023	pRS315H3alt-RPB1* rpb1 10-110 (G1097D) T69 corrected	pCK867	MATa ura3-52 his3∆200 leu2∆1 or ∆0 trp1∆63 met15∆0 lys2-128∂ gal10∆56 rpb1∆::CLONATMX RPB3::TAP::KlacTRP1 ssl2 N230I
CKY3024	pRS315H3alt-rpb1* 10-88 (F1086S) T69 corrected	pCK871	MATa ura3-52 his3∆200 leu2∆1 or ∆0 trp1∆63 met15∆0 lys2-128∂ gal10∆56 rpb1∆::CLONATMX RPB3::TAP::KlacTRP1 ssl2 N230I
CKY3025	pRS315H3alt-rpb1* 10-88 (F1086S) T69 corrected	pCK871	MATa ura3-52 his3∆200 leu2∆1 or ∆0 trp1∆63 met15∆0 lys2-128∂ gal10∆56 rpb1∆::CLONATMX RPB3::TAP::KlacTRP1 ssl2 N230I
CKY3028	pRS315H3alt-RPB1* XmaI 1122-1123 H1085Q T69 corrected	pCK887	MATa ura3-52 his3∆200 leu2∆1 or ∆0 trp1∆63 met15∆0 lys2-128∂ gal10∆56 rpb1∆::CLONATMX RPB3::TAP::KlacTRP1 ssl2 N230I
CKY3029	pRS315H3alt-RPB1* XmaI 1122-1123 H1085Q T69 corrected	pCK887	MATa ura3-52 his3∆200 leu2∆1 or ∆0 trp1∆63 met15∆0 lys2-128∂ gal10∆56 rpb1∆::CLONATMX RPB3::TAP::KlacTRP1 ssl2 N230I
CKY3030	pRS315H3alt-RPB1* XmaI 1122-1123 F1084I corrected	pCK955	MATa ura3-52 his3∆200 leu2∆1 or ∆0 trp1∆63 met15∆0 lys2-128∂ gal10∆56 rpb1∆::CLONATMX RPB3::TAP::KlacTRP1 ssl2 N230I
CKY3031	pRS315H3alt-RPB1* XmaI 1122-1123 F1084I corrected	pCK955	MATa ura3-52 his3∆200 leu2∆1 or ∆0 trp1∆63 met15∆0 lys2-128∂ gal10∆56 rpb1∆::CLONATMX RPB3::TAP::KlacTRP1 ssl2 N230I
CKY3032	pRS315H3alt-rpb1* E1103G T69 corrected	pCK960	MATa ura3-52 his3∆200 leu2∆1 or ∆0 trp1∆63 met15∆0 lys2-128∂ gal10∆56 rpb1∆::CLONATMX RPB3::TAP::KlacTRP1 ssl2 N230I
CKY3033	pRS315H3alt-rpb1* E1103G T69 corrected	pCK960	MATa ura3-52 his3∆200 leu2∆1 or ∆0 trp1∆63 met15∆0 lys2-128∂ gal10∆56 rpb1∆::CLONATMX RPB3::TAP::KlacTRP1 ssl2 N230I
CKY3034	pRS315H3alt-rpb1* XmaI 1122-1123 N1082S corrected T69 corrected USE	pCK1340	MATa ura3-52 his3∆200 leu2∆1 or ∆0 trp1∆63 met15∆0 lys2-128∂ gal10∆56 rpb1∆::CLONATMX RPB3::TAP::KlacTRP1 ssl2 N230I
CKY3035	pRS315H3alt-rpb1* XmaI 1122-1123 N1082S corrected T69 corrected USE	pCK1340	MATa ura3-52 his3∆200 leu2∆1 or ∆0 trp1∆63 met15∆0 lys2-128∂ gal10∆56 rpb1∆::CLONATMX RPB3::TAP::KlacTRP1 ssl2 N230I
CKY3042	RPB1 CEN LEU2 T69 corrected	pCK859	MATa ura3-52 his3∆200 leu2∆1 or ∆0 trp1∆63 met15∆0 lys2-128∂ gal10∆56 rpb1∆::CLONATMX RPB3::TAP::KlacTRP1 imd2Δ::HIS3 ssl2 N230I
CKY3043	RPB1 CEN LEU2 T69 corrected	pCK859	MATa ura3-52 his3∆200 leu2∆1 or ∆0 trp1∆63 met15∆0 lys2-128∂ gal10∆56 rpb1∆::CLONATMX RPB3::TAP::KlacTRP1 imd2Δ::HIS3 ssl2 N230I
CKY3048	pRS315H3alt-rpb1* rpb1 11-207 (L1101S) T69 corrected	pCK864	MATa ura3-52 his3∆200 leu2∆1 or ∆0 trp1∆63 met15∆0 lys2-128∂ gal10∆56 rpb1∆::CLONATMX RPB3::TAP::KlacTRP1 imd2Δ::HIS3 ssl2 N230I
CKY3049	pRS315H3alt-rpb1* rpb1 11-207 (L1101S) T69 corrected	pCK864	MATa ura3-52 his3∆200 leu2∆1 or ∆0 trp1∆63 met15∆0 lys2-128∂ gal10∆56 rpb1∆::CLONATMX RPB3::TAP::KlacTRP1 imd2Δ::HIS3 ssl2 N230I
CKY3050	pRS315H3alt-RPB1* rpb1 10-110 (G1097D) T69 corrected	pCK867	MATa ura3-52 his3∆200 leu2∆1 or ∆0 trp1∆63 met15∆0 lys2-128∂ gal10∆56 rpb1∆::CLONATMX RPB3::TAP::KlacTRP1 imd2Δ::HIS3 ssl2 N230I
CKY3051	pRS315H3alt-RPB1* rpb1 10-110 (G1097D) T69 corrected	pCK867	MATa ura3-52 his3∆200 leu2∆1 or ∆0 trp1∆63 met15∆0 lys2-128∂ gal10∆56 rpb1∆::CLONATMX RPB3::TAP::KlacTRP1 imd2Δ::HIS3 ssl2 N230I
CKY3052	pRS315H3alt-rpb1* 10-88 (F1086S) T69 corrected	pCK871	MATa ura3-52 his3∆200 leu2∆1 or ∆0 trp1∆63 met15∆0 lys2-128∂ gal10∆56 rpb1∆::CLONATMX RPB3::TAP::KlacTRP1 imd2Δ::HIS3 ssl2 N230I
CKY3053	pRS315H3alt-rpb1* 10-88 (F1086S) T69 corrected	pCK871	MATa ura3-52 his3∆200 leu2∆1 or ∆0 trp1∆63 met15∆0 lys2-128∂ gal10∆56 rpb1∆::CLONATMX RPB3::TAP::KlacTRP1 imd2Δ::HIS3 ssl2 N230I
CKY3056	pRS315H3alt-RPB1* XmaI 1122-1123 H1085Q T69 corrected	pCK887	MATa ura3-52 his3∆200 leu2∆1 or ∆0 trp1∆63 met15∆0 lys2-128∂ gal10∆56 rpb1∆::CLONATMX RPB3::TAP::KlacTRP1 imd2Δ::HIS3 ssl2 N230I
CKY3057	pRS315H3alt-RPB1* XmaI 1122-1123 H1085Q T69 corrected	pCK887	MATa ura3-52 his3∆200 leu2∆1 or ∆0 trp1∆63 met15∆0 lys2-128∂ gal10∆56 rpb1∆::CLONATMX RPB3::TAP::KlacTRP1 imd2Δ::HIS3 ssl2 N230I
CKY3058	pRS315H3alt-RPB1* XmaI 1122-1123 F1084I corrected	pCK955	MATa ura3-52 his3∆200 leu2∆1 or ∆0 trp1∆63 met15∆0 lys2-128∂ gal10∆56 rpb1∆::CLONATMX RPB3::TAP::KlacTRP1 imd2Δ::HIS3 ssl2 N230I
CKY3059	pRS315H3alt-RPB1* XmaI 1122-1123 F1084I corrected	pCK955	MATa ura3-52 his3∆200 leu2∆1 or ∆0 trp1∆63 met15∆0 lys2-128∂ gal10∆56 rpb1∆::CLONATMX RPB3::TAP::KlacTRP1 imd2Δ::HIS3 ssl2 N230I
CKY3060	pRS315H3alt-rpb1* E1103G T69 corrected	pCK960	MATa ura3-52 his3∆200 leu2∆1 or ∆0 trp1∆63 met15∆0 lys2-128∂ gal10∆56 rpb1∆::CLONATMX RPB3::TAP::KlacTRP1 imd2Δ::HIS3 ssl2 N230I
CKY3061	pRS315H3alt-rpb1* E1103G T69 corrected	pCK960	MATa ura3-52 his3∆200 leu2∆1 or ∆0 trp1∆63 met15∆0 lys2-128∂ gal10∆56 rpb1∆::CLONATMX RPB3::TAP::KlacTRP1 imd2Δ::HIS3 ssl2 N230I
CKY3062	pRS315H3alt-rpb1* XmaI 1122-1123 N1082S corrected T69 corrected USE	pCK1340	MATa ura3-52 his3∆200 leu2∆1 or ∆0 trp1∆63 met15∆0 lys2-128∂ gal10∆56 rpb1∆::CLONATMX RPB3::TAP::KlacTRP1 imd2Δ::HIS3 ssl2 N230I
CKY3063	pRS315H3alt-rpb1* XmaI 1122-1123 N1082S corrected T69 corrected USE	pCK1340	MATa ura3-52 his3∆200 leu2∆1 or ∆0 trp1∆63 met15∆0 lys2-128∂ gal10∆56 rpb1∆::CLONATMX RPB3::TAP::KlacTRP1 imd2Δ::HIS3 ssl2 N230I
CKY3096	RPB1 CEN LEU2 T69 corrected	pCK859	MATa ura3-52 his3∆200 leu2∆1 or ∆0 trp1∆63 met15∆0 lys2-128∂ gal10∆56 rpb1∆::CLONATMX RPB3::TAP::KlacTRP1 ssl2 N230D
CKY3097	RPB1 CEN LEU2 T69 corrected	pCK859	MATa ura3-52 his3∆200 leu2∆1 or ∆0 trp1∆63 met15∆0 lys2-128∂ gal10∆56 rpb1∆::CLONATMX RPB3::TAP::KlacTRP1 ssl2 N230D
CKY3102	pRS315H3alt rpb1*XmaI Q1078S T69 corrected	pCK863	MATa ura3-52 his3∆200 leu2∆1 or ∆0 trp1∆63 met15∆0 lys2-128∂ gal10∆56 rpb1∆::CLONATMX RPB3::TAP::KlacTRP1 ssl2 N230D
CKY3103	pRS315H3alt rpb1*XmaI Q1078S T69 corrected	pCK863	MATa ura3-52 his3∆200 leu2∆1 or ∆0 trp1∆63 met15∆0 lys2-128∂ gal10∆56 rpb1∆::CLONATMX RPB3::TAP::KlacTRP1 ssl2 N230D
CKY3104	pRS315H3alt-rpb1* rpb1 11-207 (L1101S) T69 corrected	pCK864	MATa ura3-52 his3∆200 leu2∆1 or ∆0 trp1∆63 met15∆0 lys2-128∂ gal10∆56 rpb1∆::CLONATMX RPB3::TAP::KlacTRP1 ssl2 N230D
CKY3105	pRS315H3alt-rpb1* rpb1 11-207 (L1101S) T69 corrected	pCK864	MATa ura3-52 his3∆200 leu2∆1 or ∆0 trp1∆63 met15∆0 lys2-128∂ gal10∆56 rpb1∆::CLONATMX RPB3::TAP::KlacTRP1 ssl2 N230D
CKY3162	pRS315H3alt-RPB1* rpb1 10-110 (G1097D) T69 corrected	pCK867	MATa ura3-52 his3∆200 leu2∆1 or ∆0 trp1∆63 met15∆0 lys2-128∂ gal10∆56 rpb1∆::CLONATMX RPB3::TAP::KlacTRP1 ssl2 N230D
CKY3163	pRS315H3alt-RPB1* rpb1 10-110 (G1097D) T69 corrected	pCK867	MATa ura3-52 his3∆200 leu2∆1 or ∆0 trp1∆63 met15∆0 lys2-128∂ gal10∆56 rpb1∆::CLONATMX RPB3::TAP::KlacTRP1 ssl2 N230D
CKY3164	pRS315H3alt-rpb1*XmaI H1085Y T69 corrected	pCK870	MATa ura3-52 his3∆200 leu2∆1 or ∆0 trp1∆63 met15∆0 lys2-128∂ gal10∆56 rpb1∆::CLONATMX RPB3::TAP::KlacTRP1 ssl2 N230D
CKY3165	pRS315H3alt-rpb1*XmaI H1085Y T69 corrected	pCK870	MATa ura3-52 his3∆200 leu2∆1 or ∆0 trp1∆63 met15∆0 lys2-128∂ gal10∆56 rpb1∆::CLONATMX RPB3::TAP::KlacTRP1 ssl2 N230D
CKY3106	pRS315H3alt-rpb1* 10-88 (F1086S) T69 corrected	pCK871	MATa ura3-52 his3∆200 leu2∆1 or ∆0 trp1∆63 met15∆0 lys2-128∂ gal10∆56 rpb1∆::CLONATMX RPB3::TAP::KlacTRP1 ssl2 N230D
CKY3107	pRS315H3alt-rpb1* 10-88 (F1086S) T69 corrected	pCK871	MATa ura3-52 his3∆200 leu2∆1 or ∆0 trp1∆63 met15∆0 lys2-128∂ gal10∆56 rpb1∆::CLONATMX RPB3::TAP::KlacTRP1 ssl2 N230D
CKY3110	pRS315H3alt-RPB1* XmaI 1122-1123 H1085Q T69 corrected	pCK887	MATa ura3-52 his3∆200 leu2∆1 or ∆0 trp1∆63 met15∆0 lys2-128∂ gal10∆56 rpb1∆::CLONATMX RPB3::TAP::KlacTRP1 ssl2 N230D
CKY3111	pRS315H3alt-RPB1* XmaI 1122-1123 H1085Q T69 corrected	pCK887	MATa ura3-52 his3∆200 leu2∆1 or ∆0 trp1∆63 met15∆0 lys2-128∂ gal10∆56 rpb1∆::CLONATMX RPB3::TAP::KlacTRP1 ssl2 N230D
CKY3112	pRS315H3alt-RPB1* XmaI 1122-1123 F1084I corrected	pCK955	MATa ura3-52 his3∆200 leu2∆1 or ∆0 trp1∆63 met15∆0 lys2-128∂ gal10∆56 rpb1∆::CLONATMX RPB3::TAP::KlacTRP1 ssl2 N230D
CKY3113	pRS315H3alt-RPB1* XmaI 1122-1123 F1084I corrected	pCK955	MATa ura3-52 his3∆200 leu2∆1 or ∆0 trp1∆63 met15∆0 lys2-128∂ gal10∆56 rpb1∆::CLONATMX RPB3::TAP::KlacTRP1 ssl2 N230D
CKY3114	pRS315H3alt-rpb1* E1103G T69 corrected	pCK960	MATa ura3-52 his3∆200 leu2∆1 or ∆0 trp1∆63 met15∆0 lys2-128∂ gal10∆56 rpb1∆::CLONATMX RPB3::TAP::KlacTRP1 ssl2 N230D
CKY3115	pRS315H3alt-rpb1* E1103G T69 corrected	pCK960	MATa ura3-52 his3∆200 leu2∆1 or ∆0 trp1∆63 met15∆0 lys2-128∂ gal10∆56 rpb1∆::CLONATMX RPB3::TAP::KlacTRP1 ssl2 N230D
CKY3116	pRS315H3alt-rpb1* XmaI 1122-1123 N1082S corrected T69 corrected USE	pCK1340	MATa ura3-52 his3∆200 leu2∆1 or ∆0 trp1∆63 met15∆0 lys2-128∂ gal10∆56 rpb1∆::CLONATMX RPB3::TAP::KlacTRP1 ssl2 N230D
CKY3117	pRS315H3alt-rpb1* XmaI 1122-1123 N1082S corrected T69 corrected USE	pCK1340	MATa ura3-52 his3∆200 leu2∆1 or ∆0 trp1∆63 met15∆0 lys2-128∂ gal10∆56 rpb1∆::CLONATMX RPB3::TAP::KlacTRP1 ssl2 N230D
CKY3124	RPB1 CEN LEU2 T69 corrected	pCK859	MATa ura3-52 his3∆200 leu2∆1 or ∆0 trp1∆63 met15∆0 lys2-128∂ gal10∆56 rpb1∆::CLONATMX RPB3::TAP::KlacTRP1 imd2Δ::HIS3 ssl2 N230D
CKY3125	RPB1 CEN LEU2 T69 corrected	pCK859	MATa ura3-52 his3∆200 leu2∆1 or ∆0 trp1∆63 met15∆0 lys2-128∂ gal10∆56 rpb1∆::CLONATMX RPB3::TAP::KlacTRP1 imd2Δ::HIS3 ssl2 N230D
CKY3130	pRS315H3alt rpb1*XmaI Q1078S T69 corrected	pCK863	MATa ura3-52 his3∆200 leu2∆1 or ∆0 trp1∆63 met15∆0 lys2-128∂ gal10∆56 rpb1∆::CLONATMX RPB3::TAP::KlacTRP1 imd2Δ::HIS3 ssl2 N230D
CKY3131	pRS315H3alt rpb1*XmaI Q1078S T69 corrected	pCK863	MATa ura3-52 his3∆200 leu2∆1 or ∆0 trp1∆63 met15∆0 lys2-128∂ gal10∆56 rpb1∆::CLONATMX RPB3::TAP::KlacTRP1 imd2Δ::HIS3 ssl2 N230D
CKY3132	pRS315H3alt-rpb1* rpb1 11-207 (L1101S) T69 corrected	pCK864	MATa ura3-52 his3∆200 leu2∆1 or ∆0 trp1∆63 met15∆0 lys2-128∂ gal10∆56 rpb1∆::CLONATMX RPB3::TAP::KlacTRP1 imd2Δ::HIS3 ssl2 N230D
CKY3133	pRS315H3alt-rpb1* rpb1 11-207 (L1101S) T69 corrected	pCK864	MATa ura3-52 his3∆200 leu2∆1 or ∆0 trp1∆63 met15∆0 lys2-128∂ gal10∆56 rpb1∆::CLONATMX RPB3::TAP::KlacTRP1 imd2Δ::HIS3 ssl2 N230D
CKY3166	pRS315H3alt-RPB1* rpb1 10-110 (G1097D) T69 corrected	pCK867	MATa ura3-52 his3∆200 leu2∆1 or ∆0 trp1∆63 met15∆0 lys2-128∂ gal10∆56 rpb1∆::CLONATMX RPB3::TAP::KlacTRP1 imd2Δ::HIS3 ssl2 N230D
CKY3167	pRS315H3alt-RPB1* rpb1 10-110 (G1097D) T69 corrected	pCK867	MATa ura3-52 his3∆200 leu2∆1 or ∆0 trp1∆63 met15∆0 lys2-128∂ gal10∆56 rpb1∆::CLONATMX RPB3::TAP::KlacTRP1 imd2Δ::HIS3 ssl2 N230D
CKY3168	pRS315H3alt-rpb1*XmaI H1085Y T69 corrected	pCK870	MATa ura3-52 his3∆200 leu2∆1 or ∆0 trp1∆63 met15∆0 lys2-128∂ gal10∆56 rpb1∆::CLONATMX RPB3::TAP::KlacTRP1 imd2Δ::HIS3 ssl2 N230D
CKY3169	pRS315H3alt-rpb1*XmaI H1085Y T69 corrected	pCK870	MATa ura3-52 his3∆200 leu2∆1 or ∆0 trp1∆63 met15∆0 lys2-128∂ gal10∆56 rpb1∆::CLONATMX RPB3::TAP::KlacTRP1 imd2Δ::HIS3 ssl2 N230D
CKY3134	pRS315H3alt-rpb1* 10-88 (F1086S) T69 corrected	pCK871	MATa ura3-52 his3∆200 leu2∆1 or ∆0 trp1∆63 met15∆0 lys2-128∂ gal10∆56 rpb1∆::CLONATMX RPB3::TAP::KlacTRP1 imd2Δ::HIS3 ssl2 N230D
CKY3135	pRS315H3alt-rpb1* 10-88 (F1086S) T69 corrected	pCK871	MATa ura3-52 his3∆200 leu2∆1 or ∆0 trp1∆63 met15∆0 lys2-128∂ gal10∆56 rpb1∆::CLONATMX RPB3::TAP::KlacTRP1 imd2Δ::HIS3 ssl2 N230D
CKY3138	pRS315H3alt-RPB1* XmaI 1122-1123 H1085Q T69 corrected	pCK887	MATa ura3-52 his3∆200 leu2∆1 or ∆0 trp1∆63 met15∆0 lys2-128∂ gal10∆56 rpb1∆::CLONATMX RPB3::TAP::KlacTRP1 imd2Δ::HIS3 ssl2 N230D
CKY3139	pRS315H3alt-RPB1* XmaI 1122-1123 H1085Q T69 corrected	pCK887	MATa ura3-52 his3∆200 leu2∆1 or ∆0 trp1∆63 met15∆0 lys2-128∂ gal10∆56 rpb1∆::CLONATMX RPB3::TAP::KlacTRP1 imd2Δ::HIS3 ssl2 N230D
CKY3140	pRS315H3alt-RPB1* XmaI 1122-1123 F1084I corrected	pCK955	MATa ura3-52 his3∆200 leu2∆1 or ∆0 trp1∆63 met15∆0 lys2-128∂ gal10∆56 rpb1∆::CLONATMX RPB3::TAP::KlacTRP1 imd2Δ::HIS3 ssl2 N230D
CKY3141	pRS315H3alt-RPB1* XmaI 1122-1123 F1084I corrected	pCK955	MATa ura3-52 his3∆200 leu2∆1 or ∆0 trp1∆63 met15∆0 lys2-128∂ gal10∆56 rpb1∆::CLONATMX RPB3::TAP::KlacTRP1 imd2Δ::HIS3 ssl2 N230D
CKY3142	pRS315H3alt-rpb1* E1103G T69 corrected	pCK960	MATa ura3-52 his3∆200 leu2∆1 or ∆0 trp1∆63 met15∆0 lys2-128∂ gal10∆56 rpb1∆::CLONATMX RPB3::TAP::KlacTRP1 imd2Δ::HIS3 ssl2 N230D
CKY3143	pRS315H3alt-rpb1* E1103G T69 corrected	pCK960	MATa ura3-52 his3∆200 leu2∆1 or ∆0 trp1∆63 met15∆0 lys2-128∂ gal10∆56 rpb1∆::CLONATMX RPB3::TAP::KlacTRP1 imd2Δ::HIS3 ssl2 N230D
CKY3144	pRS315H3alt-rpb1* XmaI 1122-1123 N1082S corrected T69 corrected USE	pCK1340	MATa ura3-52 his3∆200 leu2∆1 or ∆0 trp1∆63 met15∆0 lys2-128∂ gal10∆56 rpb1∆::CLONATMX RPB3::TAP::KlacTRP1 imd2Δ::HIS3 ssl2 N230D
CKY3145	pRS315H3alt-rpb1* XmaI 1122-1123 N1082S corrected T69 corrected USE	pCK1340	MATa ura3-52 his3∆200 leu2∆1 or ∆0 trp1∆63 met15∆0 lys2-128∂ gal10∆56 rpb1∆::CLONATMX RPB3::TAP::KlacTRP1 imd2Δ::HIS3 ssl2 N230D

## Sheet: 5_rpb1+sua7
Strain number	Plamids	Plasmid pCK	Genotype
CKY3359	pRS315 SSL2	pCK1480	MATa ura3-52 his3Δ200 leu2Δ0 or Δ1 trp1Δ63 met15Δ0 lys2-128∂ gal10Δ56 RPB3::TAP::KlacTRP1 imd2Δ::HIS3 ssl2∆::hph sua7-1
CKY3360	pRS315 SSL2	pCK1480	MATa ura3-52 his3Δ200 leu2Δ0 or Δ1 trp1Δ63 met15Δ0 lys2-128∂ gal10Δ56 RPB3::TAP::KlacTRP1 imd2Δ::HIS3 ssl2∆::hph sua7-1
CKY3361	pRS315 SSL2	pCK1480	MATa ura3-52 his3Δ200 leu2Δ0 or Δ1 trp1Δ63 met15Δ0 lys2-128∂ gal10Δ56 RPB3::TAP::KlacTRP1 ssl2∆::hph sua7-1
CKY3362	pRS315 SSL2	pCK1480	MATa ura3-52 his3Δ200 leu2Δ0 or Δ1 trp1Δ63 met15Δ0 lys2-128∂ gal10Δ56 RPB3::TAP::KlacTRP1 ssl2∆::hph sua7-1
CKY3393	pRSII316 SSL2	pCK1478	MATa ura3-52 his3Δ200 leu2Δ0 or Δ1 trp1Δ63 met15Δ0 lys2-128∂ gal10Δ56 RPB3::TAP::KlacTRP1 imd2Δ::HIS3 ssl2∆::hph sua7-1
CKY3394	pRSII316 SSL2	pCK1478	MATa ura3-52 his3Δ200 leu2Δ0 or Δ1 trp1Δ63 met15Δ0 lys2-128∂ gal10Δ56 RPB3::TAP::KlacTRP1 imd2Δ::HIS3 ssl2∆::hph sua7-1
CKY3395	pRSII316 SSL2	pCK1478	MATa ura3-52 his3Δ200 leu2Δ0 or Δ1 trp1Δ63 met15Δ0 lys2-128∂ gal10Δ56 RPB3::TAP::KlacTRP1 ssl2∆::hph sua7-1
CKY3396	pRSII316 SSL2	pCK1478	MATa ura3-52 his3Δ200 leu2Δ0 or Δ1 trp1Δ63 met15Δ0 lys2-128∂ gal10Δ56 RPB3::TAP::KlacTRP1 ssl2∆::hph sua7-1
CKY3430	pRS315 SSL2	pCK1480	MATa ura3-52 his3Δ200 leu2Δ0 or Δ1 trp1Δ63 met15Δ0 lys2-128∂ gal10Δ56 RPB3::TAP::KlacTRP1 imd2Δ::HIS3 ssl2∆::hph
CKY3431	pRS315 SSL2	pCK1480	MATa ura3-52 his3Δ200 leu2Δ0 or Δ1 trp1Δ63 met15Δ0 lys2-128∂ gal10Δ56 RPB3::TAP::KlacTRP1 imd2Δ::HIS3 ssl2∆::hph
CKY3432	pRS315 ssl2 N230D	pCK1835	MATa ura3-52 his3Δ200 leu2Δ0 or Δ1 trp1Δ63 met15Δ0 lys2-128∂ gal10Δ56 RPB3::TAP::KlacTRP1 imd2Δ::HIS3 ssl2∆::hph
CKY3433	pRS315 ssl2 N230D	pCK1835	MATa ura3-52 his3Δ200 leu2Δ0 or Δ1 trp1Δ63 met15Δ0 lys2-128∂ gal10Δ56 RPB3::TAP::KlacTRP1 imd2Δ::HIS3 ssl2∆::hph
CKY3434	pRS315 ssl2 Y232D	pCK1836	MATa ura3-52 his3Δ200 leu2Δ0 or Δ1 trp1Δ63 met15Δ0 lys2-128∂ gal10Δ56 RPB3::TAP::KlacTRP1 imd2Δ::HIS3 ssl2∆::hph
CKY3435	pRS315 ssl2 Y232D	pCK1836	MATa ura3-52 his3Δ200 leu2Δ0 or Δ1 trp1Δ63 met15Δ0 lys2-128∂ gal10Δ56 RPB3::TAP::KlacTRP1 imd2Δ::HIS3 ssl2∆::hph
CKY3436	pRS315 ssl2 V473D	pCK1852	MATa ura3-52 his3Δ200 leu2Δ0 or Δ1 trp1Δ63 met15Δ0 lys2-128∂ gal10Δ56 RPB3::TAP::KlacTRP1 imd2Δ::HIS3 ssl2∆::hph
CKY3437	pRS315 ssl2 V473D	pCK1852	MATa ura3-52 his3Δ200 leu2Δ0 or Δ1 trp1Δ63 met15Δ0 lys2-128∂ gal10Δ56 RPB3::TAP::KlacTRP1 imd2Δ::HIS3 ssl2∆::hph
CKY3438	pRS315 ssl2 D522V	pCK1854	MATa ura3-52 his3Δ200 leu2Δ0 or Δ1 trp1Δ63 met15Δ0 lys2-128∂ gal10Δ56 RPB3::TAP::KlacTRP1 imd2Δ::HIS3 ssl2∆::hph
CKY3439	pRS315 ssl2 D522V	pCK1854	MATa ura3-52 his3Δ200 leu2Δ0 or Δ1 trp1Δ63 met15Δ0 lys2-128∂ gal10Δ56 RPB3::TAP::KlacTRP1 imd2Δ::HIS3 ssl2∆::hph
CKY3440	pRS315 ssl2 Y750*	pCK1825	MATa ura3-52 his3Δ200 leu2Δ0 or Δ1 trp1Δ63 met15Δ0 lys2-128∂ gal10Δ56 RPB3::TAP::KlacTRP1 imd2Δ::HIS3 ssl2∆::hph
CKY3441	pRS315 ssl2 Y750*	pCK1825	MATa ura3-52 his3Δ200 leu2Δ0 or Δ1 trp1Δ63 met15Δ0 lys2-128∂ gal10Δ56 RPB3::TAP::KlacTRP1 imd2Δ::HIS3 ssl2∆::hph
CKY3442	pRS315 SSL2	pCK1480	MATa ura3-52 his3Δ200 leu2Δ0 or Δ1 trp1Δ63 met15Δ0 lys2-128∂ gal10Δ56 RPB3::TAP::KlacTRP1 ssl2∆::hph
CKY3443	pRS315 SSL2	pCK1480	MATa ura3-52 his3Δ200 leu2Δ0 or Δ1 trp1Δ63 met15Δ0 lys2-128∂ gal10Δ56 RPB3::TAP::KlacTRP1 ssl2∆::hph
CKY3444	pRS315 ssl2 N230D	pCK1835	MATa ura3-52 his3Δ200 leu2Δ0 or Δ1 trp1Δ63 met15Δ0 lys2-128∂ gal10Δ56 RPB3::TAP::KlacTRP1 ssl2∆::hph
CKY3445	pRS315 ssl2 N230D	pCK1835	MATa ura3-52 his3Δ200 leu2Δ0 or Δ1 trp1Δ63 met15Δ0 lys2-128∂ gal10Δ56 RPB3::TAP::KlacTRP1 ssl2∆::hph
CKY3446	pRS315 ssl2 Y232D	pCK1836	MATa ura3-52 his3Δ200 leu2Δ0 or Δ1 trp1Δ63 met15Δ0 lys2-128∂ gal10Δ56 RPB3::TAP::KlacTRP1 ssl2∆::hph
CKY3447	pRS315 ssl2 Y232D	pCK1836	MATa ura3-52 his3Δ200 leu2Δ0 or Δ1 trp1Δ63 met15Δ0 lys2-128∂ gal10Δ56 RPB3::TAP::KlacTRP1 ssl2∆::hph
CKY3448	pRS315 ssl2 V473D	pCK1852	MATa ura3-52 his3Δ200 leu2Δ0 or Δ1 trp1Δ63 met15Δ0 lys2-128∂ gal10Δ56 RPB3::TAP::KlacTRP1 ssl2∆::hph
CKY3449	pRS315 ssl2 V473D	pCK1852	MATa ura3-52 his3Δ200 leu2Δ0 or Δ1 trp1Δ63 met15Δ0 lys2-128∂ gal10Δ56 RPB3::TAP::KlacTRP1 ssl2∆::hph
CKY3450	pRS315 ssl2 D522V	pCK1854	MATa ura3-52 his3Δ200 leu2Δ0 or Δ1 trp1Δ63 met15Δ0 lys2-128∂ gal10Δ56 RPB3::TAP::KlacTRP1 ssl2∆::hph
CKY3451	pRS315 ssl2 D522V	pCK1854	MATa ura3-52 his3Δ200 leu2Δ0 or Δ1 trp1Δ63 met15Δ0 lys2-128∂ gal10Δ56 RPB3::TAP::KlacTRP1 ssl2∆::hph
CKY3452	pRS315 ssl2 Y750*	pCK1825	MATa ura3-52 his3Δ200 leu2Δ0 or Δ1 trp1Δ63 met15Δ0 lys2-128∂ gal10Δ56 RPB3::TAP::KlacTRP1 ssl2∆::hph
CKY3453	pRS315 ssl2 Y750*	pCK1825	MATa ura3-52 his3Δ200 leu2Δ0 or Δ1 trp1Δ63 met15Δ0 lys2-128∂ gal10Δ56 RPB3::TAP::KlacTRP1 ssl2∆::hph
CKY3454	pRS315 SSL2	pCK1480	MATa ura3-52 his3Δ200 leu2Δ0 or Δ1 trp1Δ63 met15Δ0 lys2-128∂ gal10Δ56 RPB3::TAP::KlacTRP1 imd2Δ::HIS3 ssl2∆::hph sua7-1
CKY3455	pRS315 SSL2	pCK1480	MATa ura3-52 his3Δ200 leu2Δ0 or Δ1 trp1Δ63 met15Δ0 lys2-128∂ gal10Δ56 RPB3::TAP::KlacTRP1 imd2Δ::HIS3 ssl2∆::hph sua7-1
CKY3456	pRS315 ssl2 N230D	pCK1835	MATa ura3-52 his3Δ200 leu2Δ0 or Δ1 trp1Δ63 met15Δ0 lys2-128∂ gal10Δ56 RPB3::TAP::KlacTRP1 imd2Δ::HIS3 ssl2∆::hph sua7-1
CKY3457	pRS315 ssl2 N230D	pCK1835	MATa ura3-52 his3Δ200 leu2Δ0 or Δ1 trp1Δ63 met15Δ0 lys2-128∂ gal10Δ56 RPB3::TAP::KlacTRP1 imd2Δ::HIS3 ssl2∆::hph sua7-1
CKY3458	pRS315 ssl2 Y232D	pCK1836	MATa ura3-52 his3Δ200 leu2Δ0 or Δ1 trp1Δ63 met15Δ0 lys2-128∂ gal10Δ56 RPB3::TAP::KlacTRP1 imd2Δ::HIS3 ssl2∆::hph sua7-1
CKY3459	pRS315 ssl2 Y232D	pCK1836	MATa ura3-52 his3Δ200 leu2Δ0 or Δ1 trp1Δ63 met15Δ0 lys2-128∂ gal10Δ56 RPB3::TAP::KlacTRP1 imd2Δ::HIS3 ssl2∆::hph sua7-1
CKY3460	pRS315 ssl2 V473D	pCK1852	MATa ura3-52 his3Δ200 leu2Δ0 or Δ1 trp1Δ63 met15Δ0 lys2-128∂ gal10Δ56 RPB3::TAP::KlacTRP1 imd2Δ::HIS3 ssl2∆::hph sua7-1
CKY3461	pRS315 ssl2 V473D	pCK1852	MATa ura3-52 his3Δ200 leu2Δ0 or Δ1 trp1Δ63 met15Δ0 lys2-128∂ gal10Δ56 RPB3::TAP::KlacTRP1 imd2Δ::HIS3 ssl2∆::hph sua7-1
CKY3462	pRS315 ssl2 D522V	pCK1854	MATa ura3-52 his3Δ200 leu2Δ0 or Δ1 trp1Δ63 met15Δ0 lys2-128∂ gal10Δ56 RPB3::TAP::KlacTRP1 imd2Δ::HIS3 ssl2∆::hph sua7-1
CKY3463	pRS315 ssl2 D522V	pCK1854	MATa ura3-52 his3Δ200 leu2Δ0 or Δ1 trp1Δ63 met15Δ0 lys2-128∂ gal10Δ56 RPB3::TAP::KlacTRP1 imd2Δ::HIS3 ssl2∆::hph sua7-1
CKY3464	pRS315 ssl2 Y750*	pCK1825	MATa ura3-52 his3Δ200 leu2Δ0 or Δ1 trp1Δ63 met15Δ0 lys2-128∂ gal10Δ56 RPB3::TAP::KlacTRP1 imd2Δ::HIS3 ssl2∆::hph sua7-1
CKY3465	pRS315 ssl2 Y750*	pCK1825	MATa ura3-52 his3Δ200 leu2Δ0 or Δ1 trp1Δ63 met15Δ0 lys2-128∂ gal10Δ56 RPB3::TAP::KlacTRP1 imd2Δ::HIS3 ssl2∆::hph sua7-1
CKY3466	pRS315 SSL2	pCK1480	MATa ura3-52 his3Δ200 leu2Δ0 or Δ1 trp1Δ63 met15Δ0 lys2-128∂ gal10Δ56 RPB3::TAP::KlacTRP1 ssl2∆::hph sua7-1
CKY3467	pRS315 SSL2	pCK1480	MATa ura3-52 his3Δ200 leu2Δ0 or Δ1 trp1Δ63 met15Δ0 lys2-128∂ gal10Δ56 RPB3::TAP::KlacTRP1 ssl2∆::hph sua7-1
CKY3468	pRS315 ssl2 N230D	pCK1835	MATa ura3-52 his3Δ200 leu2Δ0 or Δ1 trp1Δ63 met15Δ0 lys2-128∂ gal10Δ56 RPB3::TAP::KlacTRP1 ssl2∆::hph sua7-1
CKY3469	pRS315 ssl2 N230D	pCK1835	MATa ura3-52 his3Δ200 leu2Δ0 or Δ1 trp1Δ63 met15Δ0 lys2-128∂ gal10Δ56 RPB3::TAP::KlacTRP1 ssl2∆::hph sua7-1
CKY3470	pRS315 ssl2 Y232D	pCK1836	MATa ura3-52 his3Δ200 leu2Δ0 or Δ1 trp1Δ63 met15Δ0 lys2-128∂ gal10Δ56 RPB3::TAP::KlacTRP1 ssl2∆::hph sua7-1
CKY3471	pRS315 ssl2 Y232D	pCK1836	MATa ura3-52 his3Δ200 leu2Δ0 or Δ1 trp1Δ63 met15Δ0 lys2-128∂ gal10Δ56 RPB3::TAP::KlacTRP1 ssl2∆::hph sua7-1
CKY3472	pRS315 ssl2 V473D	pCK1852	MATa ura3-52 his3Δ200 leu2Δ0 or Δ1 trp1Δ63 met15Δ0 lys2-128∂ gal10Δ56 RPB3::TAP::KlacTRP1 ssl2∆::hph sua7-1
CKY3473	pRS315 ssl2 V473D	pCK1852	MATa ura3-52 his3Δ200 leu2Δ0 or Δ1 trp1Δ63 met15Δ0 lys2-128∂ gal10Δ56 RPB3::TAP::KlacTRP1 ssl2∆::hph sua7-1
CKY3474	pRS315 ssl2 D522V	pCK1854	MATa ura3-52 his3Δ200 leu2Δ0 or Δ1 trp1Δ63 met15Δ0 lys2-128∂ gal10Δ56 RPB3::TAP::KlacTRP1 ssl2∆::hph sua7-1
CKY3475	pRS315 ssl2 D522V	pCK1854	MATa ura3-52 his3Δ200 leu2Δ0 or Δ1 trp1Δ63 met15Δ0 lys2-128∂ gal10Δ56 RPB3::TAP::KlacTRP1 ssl2∆::hph sua7-1
CKY3476	pRS315 ssl2 Y750*	pCK1825	MATa ura3-52 his3Δ200 leu2Δ0 or Δ1 trp1Δ63 met15Δ0 lys2-128∂ gal10Δ56 RPB3::TAP::KlacTRP1 ssl2∆::hph sua7-1
CKY3477	pRS315 ssl2 Y750*	pCK1825	MATa ura3-52 his3Δ200 leu2Δ0 or Δ1 trp1Δ63 met15Δ0 lys2-128∂ gal10Δ56 RPB3::TAP::KlacTRP1 ssl2∆::hph sua7-1

## Sheet: 6_rpb1+tfg2
Strain number	Plamids	Plasmid pCK	Genotype
CKY4114	pRS315 SSL2	pCK1480	MATa ura3-52 his3Δ200 leu2Δ0 or Δ1 trp1Δ63 met15Δ0 lys2-128∂ gal10Δ56 RPB3::TAP::KlacTRP1 imd2Δ::HIS3 ssl2∆::hph tfg2∆146-180
CKY4115	pRS315 SSL2	pCK1480	MATa ura3-52 his3Δ200 leu2Δ0 or Δ1 trp1Δ63 met15Δ0 lys2-128∂ gal10Δ56 RPB3::TAP::KlacTRP1 imd2Δ::HIS3 ssl2∆::hph tfg2∆146-180
CKY4116	pRS315 SSL2	pCK1480	MATa ura3-52 his3Δ200 leu2Δ0 or Δ1 trp1Δ63 met15Δ0 lys2-128∂ gal10Δ56 RPB3::TAP::KlacTRP1 ssl2∆::hph tfg2∆146-180
CKY4117	pRS315 SSL2	pCK1480	MATa ura3-52 his3Δ200 leu2Δ0 or Δ1 trp1Δ63 met15Δ0 lys2-128∂ gal10Δ56 RPB3::TAP::KlacTRP1 ssl2∆::hph tfg2∆146-180
CKY4268	pRSII316 SSL2	pCK1478	MATa ura3-52 his3Δ200 leu2Δ0 or Δ1 trp1Δ63 met15Δ0 lys2-128∂ gal10Δ56 RPB3::TAP::KlacTRP1 imd2Δ::HIS3 ssl2∆::hph tfg2∆146-180
CKY4269	pRSII316 SSL2	pCK1478	MATa ura3-52 his3Δ200 leu2Δ0 or Δ1 trp1Δ63 met15Δ0 lys2-128∂ gal10Δ56 RPB3::TAP::KlacTRP1 imd2Δ::HIS3 ssl2∆::hph tfg2∆146-180
CKY4270	pRSII316 SSL2	pCK1478	MATa ura3-52 his3Δ200 leu2Δ0 or Δ1 trp1Δ63 met15Δ0 lys2-128∂ gal10Δ56 RPB3::TAP::KlacTRP1 ssl2∆::hph tfg2∆146-180
CKY4271	pRSII316 SSL2	pCK1478	MATa ura3-52 his3Δ200 leu2Δ0 or Δ1 trp1Δ63 met15Δ0 lys2-128∂ gal10Δ56 RPB3::TAP::KlacTRP1 ssl2∆::hph tfg2∆146-180
CKY4319	pRS315 SSL2	pCK1480	MATa ura3-52 his3Δ200 leu2Δ0 or Δ1 trp1Δ63 met15Δ0 lys2-128∂ gal10Δ56 RPB3::TAP::KlacTRP1 imd2Δ::HIS3 ssl2∆::hph
CKY4320	pRS315 SSL2	pCK1480	MATa ura3-52 his3Δ200 leu2Δ0 or Δ1 trp1Δ63 met15Δ0 lys2-128∂ gal10Δ56 RPB3::TAP::KlacTRP1 imd2Δ::HIS3 ssl2∆::hph
CKY4321	pRS315 ssl2 T176P	pCK1996	MATa ura3-52 his3Δ200 leu2Δ0 or Δ1 trp1Δ63 met15Δ0 lys2-128∂ gal10Δ56 RPB3::TAP::KlacTRP1 imd2Δ::HIS3 ssl2∆::hph
CKY4322	pRS315 ssl2 T176P	pCK1996	MATa ura3-52 his3Δ200 leu2Δ0 or Δ1 trp1Δ63 met15Δ0 lys2-128∂ gal10Δ56 RPB3::TAP::KlacTRP1 imd2Δ::HIS3 ssl2∆::hph
CKY4323	pRS315 ssl2 L225P	pCK1831	MATa ura3-52 his3Δ200 leu2Δ0 or Δ1 trp1Δ63 met15Δ0 lys2-128∂ gal10Δ56 RPB3::TAP::KlacTRP1 imd2Δ::HIS3 ssl2∆::hph
CKY4324	pRS315 ssl2 L225P	pCK1831	MATa ura3-52 his3Δ200 leu2Δ0 or Δ1 trp1Δ63 met15Δ0 lys2-128∂ gal10Δ56 RPB3::TAP::KlacTRP1 imd2Δ::HIS3 ssl2∆::hph
CKY4325	pRS315 ssl2 N230I	pCK1834	MATa ura3-52 his3Δ200 leu2Δ0 or Δ1 trp1Δ63 met15Δ0 lys2-128∂ gal10Δ56 RPB3::TAP::KlacTRP1 imd2Δ::HIS3 ssl2∆::hph
CKY4326	pRS315 ssl2 N230I	pCK1834	MATa ura3-52 his3Δ200 leu2Δ0 or Δ1 trp1Δ63 met15Δ0 lys2-128∂ gal10Δ56 RPB3::TAP::KlacTRP1 imd2Δ::HIS3 ssl2∆::hph
CKY4327	pRS315 ssl2 R636C	pCK1861	MATa ura3-52 his3Δ200 leu2Δ0 or Δ1 trp1Δ63 met15Δ0 lys2-128∂ gal10Δ56 RPB3::TAP::KlacTRP1 imd2Δ::HIS3 ssl2∆::hph
CKY4328	pRS315 ssl2 R636C	pCK1861	MATa ura3-52 his3Δ200 leu2Δ0 or Δ1 trp1Δ63 met15Δ0 lys2-128∂ gal10Δ56 RPB3::TAP::KlacTRP1 imd2Δ::HIS3 ssl2∆::hph
CKY4329	pRS315 SSL2	pCK1480	MATa ura3-52 his3Δ200 leu2Δ0 or Δ1 trp1Δ63 met15Δ0 lys2-128∂ gal10Δ56 RPB3::TAP::KlacTRP1 ssl2∆::hph
CKY4330	pRS315 SSL2	pCK1480	MATa ura3-52 his3Δ200 leu2Δ0 or Δ1 trp1Δ63 met15Δ0 lys2-128∂ gal10Δ56 RPB3::TAP::KlacTRP1 ssl2∆::hph
CKY4331	pRS315 ssl2 T176P	pCK1996	MATa ura3-52 his3Δ200 leu2Δ0 or Δ1 trp1Δ63 met15Δ0 lys2-128∂ gal10Δ56 RPB3::TAP::KlacTRP1 ssl2∆::hph
CKY4332	pRS315 ssl2 T176P	pCK1996	MATa ura3-52 his3Δ200 leu2Δ0 or Δ1 trp1Δ63 met15Δ0 lys2-128∂ gal10Δ56 RPB3::TAP::KlacTRP1 ssl2∆::hph
CKY4333	pRS315 ssl2 L225P	pCK1831	MATa ura3-52 his3Δ200 leu2Δ0 or Δ1 trp1Δ63 met15Δ0 lys2-128∂ gal10Δ56 RPB3::TAP::KlacTRP1 ssl2∆::hph
CKY4334	pRS315 ssl2 L225P	pCK1831	MATa ura3-52 his3Δ200 leu2Δ0 or Δ1 trp1Δ63 met15Δ0 lys2-128∂ gal10Δ56 RPB3::TAP::KlacTRP1 ssl2∆::hph
CKY4335	pRS315 ssl2 N230I	pCK1834	MATa ura3-52 his3Δ200 leu2Δ0 or Δ1 trp1Δ63 met15Δ0 lys2-128∂ gal10Δ56 RPB3::TAP::KlacTRP1 ssl2∆::hph
CKY4336	pRS315 ssl2 N230I	pCK1834	MATa ura3-52 his3Δ200 leu2Δ0 or Δ1 trp1Δ63 met15Δ0 lys2-128∂ gal10Δ56 RPB3::TAP::KlacTRP1 ssl2∆::hph
CKY4337	pRS315 ssl2 R636C	pCK1861	MATa ura3-52 his3Δ200 leu2Δ0 or Δ1 trp1Δ63 met15Δ0 lys2-128∂ gal10Δ56 RPB3::TAP::KlacTRP1 ssl2∆::hph
CKY4338	pRS315 ssl2 R636C	pCK1861	MATa ura3-52 his3Δ200 leu2Δ0 or Δ1 trp1Δ63 met15Δ0 lys2-128∂ gal10Δ56 RPB3::TAP::KlacTRP1 ssl2∆::hph
CKY4339	pRS315 SSL2	pCK1480	MATa ura3-52 his3Δ200 leu2Δ0 or Δ1 trp1Δ63 met15Δ0 lys2-128∂ gal10Δ56 RPB3::TAP::KlacTRP1 imd2Δ::HIS3 ssl2∆::hph tfg2∆146-180
CKY4340	pRS315 SSL2	pCK1480	MATa ura3-52 his3Δ200 leu2Δ0 or Δ1 trp1Δ63 met15Δ0 lys2-128∂ gal10Δ56 RPB3::TAP::KlacTRP1 imd2Δ::HIS3 ssl2∆::hph tfg2∆146-180
CKY4341	pRS315 ssl2 T176P	pCK1996	MATa ura3-52 his3Δ200 leu2Δ0 or Δ1 trp1Δ63 met15Δ0 lys2-128∂ gal10Δ56 RPB3::TAP::KlacTRP1 imd2Δ::HIS3 ssl2∆::hph tfg2∆146-180
CKY4342	pRS315 ssl2 T176P	pCK1996	MATa ura3-52 his3Δ200 leu2Δ0 or Δ1 trp1Δ63 met15Δ0 lys2-128∂ gal10Δ56 RPB3::TAP::KlacTRP1 imd2Δ::HIS3 ssl2∆::hph tfg2∆146-180
CKY4343	pRS315 ssl2 L225P	pCK1831	MATa ura3-52 his3Δ200 leu2Δ0 or Δ1 trp1Δ63 met15Δ0 lys2-128∂ gal10Δ56 RPB3::TAP::KlacTRP1 imd2Δ::HIS3 ssl2∆::hph tfg2∆146-180
CKY4344	pRS315 ssl2 L225P	pCK1831	MATa ura3-52 his3Δ200 leu2Δ0 or Δ1 trp1Δ63 met15Δ0 lys2-128∂ gal10Δ56 RPB3::TAP::KlacTRP1 imd2Δ::HIS3 ssl2∆::hph tfg2∆146-180
CKY4345	pRS315 ssl2 N230I	pCK1834	MATa ura3-52 his3Δ200 leu2Δ0 or Δ1 trp1Δ63 met15Δ0 lys2-128∂ gal10Δ56 RPB3::TAP::KlacTRP1 imd2Δ::HIS3 ssl2∆::hph tfg2∆146-180
CKY4346	pRS315 ssl2 N230I	pCK1834	MATa ura3-52 his3Δ200 leu2Δ0 or Δ1 trp1Δ63 met15Δ0 lys2-128∂ gal10Δ56 RPB3::TAP::KlacTRP1 imd2Δ::HIS3 ssl2∆::hph tfg2∆146-180
CKY4347	pRS315 ssl2 R636C	pCK1861	MATa ura3-52 his3Δ200 leu2Δ0 or Δ1 trp1Δ63 met15Δ0 lys2-128∂ gal10Δ56 RPB3::TAP::KlacTRP1 imd2Δ::HIS3 ssl2∆::hph tfg2∆146-180
CKY4348	pRS315 ssl2 R636C	pCK1861	MATa ura3-52 his3Δ200 leu2Δ0 or Δ1 trp1Δ63 met15Δ0 lys2-128∂ gal10Δ56 RPB3::TAP::KlacTRP1 imd2Δ::HIS3 ssl2∆::hph tfg2∆146-180
CKY4349	pRS315 SSL2	pCK1480	MATa ura3-52 his3Δ200 leu2Δ0 or Δ1 trp1Δ63 met15Δ0 lys2-128∂ gal10Δ56 RPB3::TAP::KlacTRP1 ssl2∆::hph tfg2∆146-180
CKY4350	pRS315 SSL2	pCK1480	MATa ura3-52 his3Δ200 leu2Δ0 or Δ1 trp1Δ63 met15Δ0 lys2-128∂ gal10Δ56 RPB3::TAP::KlacTRP1 ssl2∆::hph tfg2∆146-180
CKY4351	pRS315 ssl2 T176P	pCK1996	MATa ura3-52 his3Δ200 leu2Δ0 or Δ1 trp1Δ63 met15Δ0 lys2-128∂ gal10Δ56 RPB3::TAP::KlacTRP1 ssl2∆::hph tfg2∆146-180
CKY4352	pRS315 ssl2 T176P	pCK1996	MATa ura3-52 his3Δ200 leu2Δ0 or Δ1 trp1Δ63 met15Δ0 lys2-128∂ gal10Δ56 RPB3::TAP::KlacTRP1 ssl2∆::hph tfg2∆146-180
CKY4353	pRS315 ssl2 L225P	pCK1831	MATa ura3-52 his3Δ200 leu2Δ0 or Δ1 trp1Δ63 met15Δ0 lys2-128∂ gal10Δ56 RPB3::TAP::KlacTRP1 ssl2∆::hph tfg2∆146-180
CKY4354	pRS315 ssl2 L225P	pCK1831	MATa ura3-52 his3Δ200 leu2Δ0 or Δ1 trp1Δ63 met15Δ0 lys2-128∂ gal10Δ56 RPB3::TAP::KlacTRP1 ssl2∆::hph tfg2∆146-180
CKY4355	pRS315 ssl2 N230I	pCK1834	MATa ura3-52 his3Δ200 leu2Δ0 or Δ1 trp1Δ63 met15Δ0 lys2-128∂ gal10Δ56 RPB3::TAP::KlacTRP1 ssl2∆::hph tfg2∆146-180
CKY4356	pRS315 ssl2 N230I	pCK1834	MATa ura3-52 his3Δ200 leu2Δ0 or Δ1 trp1Δ63 met15Δ0 lys2-128∂ gal10Δ56 RPB3::TAP::KlacTRP1 ssl2∆::hph tfg2∆146-180
CKY4357	pRS315 ssl2 R636C	pCK1861	MATa ura3-52 his3Δ200 leu2Δ0 or Δ1 trp1Δ63 met15Δ0 lys2-128∂ gal10Δ56 RPB3::TAP::KlacTRP1 ssl2∆::hph tfg2∆146-180
CKY4358	pRS315 ssl2 R636C	pCK1861	MATa ura3-52 his3Δ200 leu2Δ0 or Δ1 trp1Δ63 met15Δ0 lys2-128∂ gal10Δ56 RPB3::TAP::KlacTRP1 ssl2∆::hph tfg2∆146-180
CKY4495	pRS315 ssl2 Y750*	pCK1825	MATa ura3-52 his3Δ200 leu2Δ0 or Δ1 trp1Δ63 met15Δ0 lys2-128∂ gal10Δ56 RPB3::TAP::KlacTRP1 imd2Δ::HIS3 ssl2∆::hph
CKY4496	pRS315 ssl2 Y750*	pCK1825	MATa ura3-52 his3Δ200 leu2Δ0 or Δ1 trp1Δ63 met15Δ0 lys2-128∂ gal10Δ56 RPB3::TAP::KlacTRP1 imd2Δ::HIS3 ssl2∆::hph
CKY4497	pRS315 ssl2 Y750*	pCK1825	MATa ura3-52 his3Δ200 leu2Δ0 or Δ1 trp1Δ63 met15Δ0 lys2-128∂ gal10Δ56 RPB3::TAP::KlacTRP1 ssl2∆::hph
CKY4498	pRS315 ssl2 Y750*	pCK1825	MATa ura3-52 his3Δ200 leu2Δ0 or Δ1 trp1Δ63 met15Δ0 lys2-128∂ gal10Δ56 RPB3::TAP::KlacTRP1 ssl2∆::hph
CKY4499	pRS315 ssl2 Y750*	pCK1825	MATa ura3-52 his3Δ200 leu2Δ0 or Δ1 trp1Δ63 met15Δ0 lys2-128∂ gal10Δ56 RPB3::TAP::KlacTRP1 imd2Δ::HIS3 ssl2∆::hph tfg2∆146-180
CKY4500	pRS315 ssl2 Y750*	pCK1825	MATa ura3-52 his3Δ200 leu2Δ0 or Δ1 trp1Δ63 met15Δ0 lys2-128∂ gal10Δ56 RPB3::TAP::KlacTRP1 imd2Δ::HIS3 ssl2∆::hph tfg2∆146-180
CKY4501	pRS315 ssl2 Y750*	pCK1825	MATa ura3-52 his3Δ200 leu2Δ0 or Δ1 trp1Δ63 met15Δ0 lys2-128∂ gal10Δ56 RPB3::TAP::KlacTRP1 ssl2∆::hph tfg2∆146-180
CKY4502	pRS315 ssl2 Y750*	pCK1825	MATa ura3-52 his3Δ200 leu2Δ0 or Δ1 trp1Δ63 met15Δ0 lys2-128∂ gal10Δ56 RPB3::TAP::KlacTRP1 ssl2∆::hph tfg2∆146-180

## Sheet: 7_rpb1+sub1
Strain number	Plamids	Plasmid pCK	Genotype
CKY2203	pRSII316 SSL2	pCK1478	MATa ura3-52 his3Δ200 leu2Δ0 or Δ1 trp1Δ63 met15Δ0 lys2-128∂ gal10Δ56 RPB3::TAP::KlacTRP1 imd2Δ::HIS3 ssl2∆::hph sub1∆::natMX
CKY2204	pRSII316 SSL2	pCK1478	MATa ura3-52 his3Δ200 leu2Δ0 or Δ1 trp1Δ63 met15Δ0 lys2-128∂ gal10Δ56 RPB3::TAP::KlacTRP1 imd2Δ::HIS3 ssl2∆::hph sub1∆::natMX
CKY2205	pRSII316 SSL2	pCK1478	MATa ura3-52 his3Δ200 leu2Δ0 or Δ1 trp1Δ63 met15Δ0 lys2-128∂ gal10Δ56 RPB3::TAP::KlacTRP1 ssl2∆::hph sub1∆::natMX
CKY2206	pRSII316 SSL2	pCK1478	MATa ura3-52 his3Δ200 leu2Δ0 or Δ1 trp1Δ63 met15Δ0 lys2-128∂ gal10Δ56 RPB3::TAP::KlacTRP1 ssl2∆::hph sub1∆::natMX
CKY2475	pRS315 ssl2 L225P	pCK1831	MATa ura3-52 his3Δ200 leu2Δ0 or Δ1 trp1Δ63 met15Δ0 lys2-128∂ gal10Δ56 RPB3::TAP::KlacTRP1 imd2Δ::HIS3 ssl2∆::hph
CKY2476	pRS315 ssl2 L225P	pCK1831	MATa ura3-52 his3Δ200 leu2Δ0 or Δ1 trp1Δ63 met15Δ0 lys2-128∂ gal10Δ56 RPB3::TAP::KlacTRP1 imd2Δ::HIS3 ssl2∆::hph
CKY2477	pRS315 ssl2 N230I	pCK1834	MATa ura3-52 his3Δ200 leu2Δ0 or Δ1 trp1Δ63 met15Δ0 lys2-128∂ gal10Δ56 RPB3::TAP::KlacTRP1 imd2Δ::HIS3 ssl2∆::hph
CKY2478	pRS315 ssl2 N230I	pCK1834	MATa ura3-52 his3Δ200 leu2Δ0 or Δ1 trp1Δ63 met15Δ0 lys2-128∂ gal10Δ56 RPB3::TAP::KlacTRP1 imd2Δ::HIS3 ssl2∆::hph
CKY2479	pRS315 ssl2 N230D	pCK1835	MATa ura3-52 his3Δ200 leu2Δ0 or Δ1 trp1Δ63 met15Δ0 lys2-128∂ gal10Δ56 RPB3::TAP::KlacTRP1 imd2Δ::HIS3 ssl2∆::hph
CKY2480	pRS315 ssl2 N230D	pCK1835	MATa ura3-52 his3Δ200 leu2Δ0 or Δ1 trp1Δ63 met15Δ0 lys2-128∂ gal10Δ56 RPB3::TAP::KlacTRP1 imd2Δ::HIS3 ssl2∆::hph
CKY2481	pRS315 ssl2 V473D	pCK1852	MATa ura3-52 his3Δ200 leu2Δ0 or Δ1 trp1Δ63 met15Δ0 lys2-128∂ gal10Δ56 RPB3::TAP::KlacTRP1 imd2Δ::HIS3 ssl2∆::hph
CKY2482	pRS315 ssl2 V473D	pCK1852	MATa ura3-52 his3Δ200 leu2Δ0 or Δ1 trp1Δ63 met15Δ0 lys2-128∂ gal10Δ56 RPB3::TAP::KlacTRP1 imd2Δ::HIS3 ssl2∆::hph
CKY2483	pRS315 ssl2 D522V	pCK1854	MATa ura3-52 his3Δ200 leu2Δ0 or Δ1 trp1Δ63 met15Δ0 lys2-128∂ gal10Δ56 RPB3::TAP::KlacTRP1 imd2Δ::HIS3 ssl2∆::hph
CKY2484	pRS315 ssl2 D522V	pCK1854	MATa ura3-52 his3Δ200 leu2Δ0 or Δ1 trp1Δ63 met15Δ0 lys2-128∂ gal10Δ56 RPB3::TAP::KlacTRP1 imd2Δ::HIS3 ssl2∆::hph
CKY2485	pRS315 ssl2 R636C	pCK1861	MATa ura3-52 his3Δ200 leu2Δ0 or Δ1 trp1Δ63 met15Δ0 lys2-128∂ gal10Δ56 RPB3::TAP::KlacTRP1 imd2Δ::HIS3 ssl2∆::hph
CKY2486	pRS315 ssl2 R636C	pCK1861	MATa ura3-52 his3Δ200 leu2Δ0 or Δ1 trp1Δ63 met15Δ0 lys2-128∂ gal10Δ56 RPB3::TAP::KlacTRP1 imd2Δ::HIS3 ssl2∆::hph
CKY2487	pRS315 ssl2 Y750*	pCK1825	MATa ura3-52 his3Δ200 leu2Δ0 or Δ1 trp1Δ63 met15Δ0 lys2-128∂ gal10Δ56 RPB3::TAP::KlacTRP1 imd2Δ::HIS3 ssl2∆::hph
CKY2488	pRS315 ssl2 Y750*	pCK1825	MATa ura3-52 his3Δ200 leu2Δ0 or Δ1 trp1Δ63 met15Δ0 lys2-128∂ gal10Δ56 RPB3::TAP::KlacTRP1 imd2Δ::HIS3 ssl2∆::hph
CKY2489	pRS315 SSL2	pCK1480	MATa ura3-52 his3Δ200 leu2Δ0 or Δ1 trp1Δ63 met15Δ0 lys2-128∂ gal10Δ56 RPB3::TAP::KlacTRP1 imd2Δ::HIS3 ssl2∆::hph
CKY2490	pRS315 SSL2	pCK1480	MATa ura3-52 his3Δ200 leu2Δ0 or Δ1 trp1Δ63 met15Δ0 lys2-128∂ gal10Δ56 RPB3::TAP::KlacTRP1 imd2Δ::HIS3 ssl2∆::hph
CKY2493	pRS315 ssl2 L225P	pCK1831	MATa ura3-52 his3Δ200 leu2Δ0 or Δ1 trp1Δ63 met15Δ0 lys2-128∂ gal10Δ56 RPB3::TAP::KlacTRP1 ssl2∆::hph
CKY2494	pRS315 ssl2 L225P	pCK1831	MATa ura3-52 his3Δ200 leu2Δ0 or Δ1 trp1Δ63 met15Δ0 lys2-128∂ gal10Δ56 RPB3::TAP::KlacTRP1 ssl2∆::hph
CKY2495	pRS315 ssl2 N230I	pCK1834	MATa ura3-52 his3Δ200 leu2Δ0 or Δ1 trp1Δ63 met15Δ0 lys2-128∂ gal10Δ56 RPB3::TAP::KlacTRP1 ssl2∆::hph
CKY2496	pRS315 ssl2 N230I	pCK1834	MATa ura3-52 his3Δ200 leu2Δ0 or Δ1 trp1Δ63 met15Δ0 lys2-128∂ gal10Δ56 RPB3::TAP::KlacTRP1 ssl2∆::hph
CKY2497	pRS315 ssl2 N230D	pCK1835	MATa ura3-52 his3Δ200 leu2Δ0 or Δ1 trp1Δ63 met15Δ0 lys2-128∂ gal10Δ56 RPB3::TAP::KlacTRP1 ssl2∆::hph
CKY2498	pRS315 ssl2 N230D	pCK1835	MATa ura3-52 his3Δ200 leu2Δ0 or Δ1 trp1Δ63 met15Δ0 lys2-128∂ gal10Δ56 RPB3::TAP::KlacTRP1 ssl2∆::hph
CKY2499	pRS315 ssl2 V473D	pCK1852	MATa ura3-52 his3Δ200 leu2Δ0 or Δ1 trp1Δ63 met15Δ0 lys2-128∂ gal10Δ56 RPB3::TAP::KlacTRP1 ssl2∆::hph
CKY2500	pRS315 ssl2 V473D	pCK1852	MATa ura3-52 his3Δ200 leu2Δ0 or Δ1 trp1Δ63 met15Δ0 lys2-128∂ gal10Δ56 RPB3::TAP::KlacTRP1 ssl2∆::hph
CKY2501	pRS315 ssl2 D522V	pCK1854	MATa ura3-52 his3Δ200 leu2Δ0 or Δ1 trp1Δ63 met15Δ0 lys2-128∂ gal10Δ56 RPB3::TAP::KlacTRP1 ssl2∆::hph
CKY2502	pRS315 ssl2 D522V	pCK1854	MATa ura3-52 his3Δ200 leu2Δ0 or Δ1 trp1Δ63 met15Δ0 lys2-128∂ gal10Δ56 RPB3::TAP::KlacTRP1 ssl2∆::hph
CKY2503	pRS315 ssl2 R636C	pCK1861	MATa ura3-52 his3Δ200 leu2Δ0 or Δ1 trp1Δ63 met15Δ0 lys2-128∂ gal10Δ56 RPB3::TAP::KlacTRP1 ssl2∆::hph
CKY2504	pRS315 ssl2 R636C	pCK1861	MATa ura3-52 his3Δ200 leu2Δ0 or Δ1 trp1Δ63 met15Δ0 lys2-128∂ gal10Δ56 RPB3::TAP::KlacTRP1 ssl2∆::hph
CKY2505	pRS315 ssl2 Y750*	pCK1825	MATa ura3-52 his3Δ200 leu2Δ0 or Δ1 trp1Δ63 met15Δ0 lys2-128∂ gal10Δ56 RPB3::TAP::KlacTRP1 ssl2∆::hph
CKY2506	pRS315 ssl2 Y750*	pCK1825	MATa ura3-52 his3Δ200 leu2Δ0 or Δ1 trp1Δ63 met15Δ0 lys2-128∂ gal10Δ56 RPB3::TAP::KlacTRP1 ssl2∆::hph
CKY2507	pRS315 SSL2	pCK1480	MATa ura3-52 his3Δ200 leu2Δ0 or Δ1 trp1Δ63 met15Δ0 lys2-128∂ gal10Δ56 RPB3::TAP::KlacTRP1 ssl2∆::hph
CKY2508	pRS315 SSL2	pCK1480	MATa ura3-52 his3Δ200 leu2Δ0 or Δ1 trp1Δ63 met15Δ0 lys2-128∂ gal10Δ56 RPB3::TAP::KlacTRP1 ssl2∆::hph
CKY2511	pRS315 ssl2 L225P	pCK1831	MATa ura3-52 his3Δ200 leu2Δ0 or Δ1 trp1Δ63 met15Δ0 lys2-128∂ gal10Δ56 RPB3::TAP::KlacTRP1 imd2Δ::HIS3 ssl2∆::hph sub1∆::natMX
CKY2512	pRS315 ssl2 L225P	pCK1831	MATa ura3-52 his3Δ200 leu2Δ0 or Δ1 trp1Δ63 met15Δ0 lys2-128∂ gal10Δ56 RPB3::TAP::KlacTRP1 imd2Δ::HIS3 ssl2∆::hph sub1∆::natMX
CKY2513	pRS315 ssl2 N230I	pCK1834	MATa ura3-52 his3Δ200 leu2Δ0 or Δ1 trp1Δ63 met15Δ0 lys2-128∂ gal10Δ56 RPB3::TAP::KlacTRP1 imd2Δ::HIS3 ssl2∆::hph sub1∆::natMX
CKY2514	pRS315 ssl2 N230I	pCK1834	MATa ura3-52 his3Δ200 leu2Δ0 or Δ1 trp1Δ63 met15Δ0 lys2-128∂ gal10Δ56 RPB3::TAP::KlacTRP1 imd2Δ::HIS3 ssl2∆::hph sub1∆::natMX
CKY2515	pRS315 ssl2 N230D	pCK1835	MATa ura3-52 his3Δ200 leu2Δ0 or Δ1 trp1Δ63 met15Δ0 lys2-128∂ gal10Δ56 RPB3::TAP::KlacTRP1 imd2Δ::HIS3 ssl2∆::hph sub1∆::natMX
CKY2516	pRS315 ssl2 N230D	pCK1835	MATa ura3-52 his3Δ200 leu2Δ0 or Δ1 trp1Δ63 met15Δ0 lys2-128∂ gal10Δ56 RPB3::TAP::KlacTRP1 imd2Δ::HIS3 ssl2∆::hph sub1∆::natMX
CKY2517	pRS315 ssl2 V473D	pCK1852	MATa ura3-52 his3Δ200 leu2Δ0 or Δ1 trp1Δ63 met15Δ0 lys2-128∂ gal10Δ56 RPB3::TAP::KlacTRP1 imd2Δ::HIS3 ssl2∆::hph sub1∆::natMX
CKY2518	pRS315 ssl2 V473D	pCK1852	MATa ura3-52 his3Δ200 leu2Δ0 or Δ1 trp1Δ63 met15Δ0 lys2-128∂ gal10Δ56 RPB3::TAP::KlacTRP1 imd2Δ::HIS3 ssl2∆::hph sub1∆::natMX
CKY2519	pRS315 ssl2 D522V	pCK1854	MATa ura3-52 his3Δ200 leu2Δ0 or Δ1 trp1Δ63 met15Δ0 lys2-128∂ gal10Δ56 RPB3::TAP::KlacTRP1 imd2Δ::HIS3 ssl2∆::hph sub1∆::natMX
CKY2520	pRS315 ssl2 D522V	pCK1854	MATa ura3-52 his3Δ200 leu2Δ0 or Δ1 trp1Δ63 met15Δ0 lys2-128∂ gal10Δ56 RPB3::TAP::KlacTRP1 imd2Δ::HIS3 ssl2∆::hph sub1∆::natMX
CKY2521	pRS315 ssl2 R636C	pCK1861	MATa ura3-52 his3Δ200 leu2Δ0 or Δ1 trp1Δ63 met15Δ0 lys2-128∂ gal10Δ56 RPB3::TAP::KlacTRP1 imd2Δ::HIS3 ssl2∆::hph sub1∆::natMX
CKY2522	pRS315 ssl2 R636C	pCK1861	MATa ura3-52 his3Δ200 leu2Δ0 or Δ1 trp1Δ63 met15Δ0 lys2-128∂ gal10Δ56 RPB3::TAP::KlacTRP1 imd2Δ::HIS3 ssl2∆::hph sub1∆::natMX
CKY2523	pRS315 ssl2 Y750*	pCK1825	MATa ura3-52 his3Δ200 leu2Δ0 or Δ1 trp1Δ63 met15Δ0 lys2-128∂ gal10Δ56 RPB3::TAP::KlacTRP1 imd2Δ::HIS3 ssl2∆::hph sub1∆::natMX
CKY2524	pRS315 ssl2 Y750*	pCK1825	MATa ura3-52 his3Δ200 leu2Δ0 or Δ1 trp1Δ63 met15Δ0 lys2-128∂ gal10Δ56 RPB3::TAP::KlacTRP1 imd2Δ::HIS3 ssl2∆::hph sub1∆::natMX
CKY2525	pRS315 SSL2	pCK1480	MATa ura3-52 his3Δ200 leu2Δ0 or Δ1 trp1Δ63 met15Δ0 lys2-128∂ gal10Δ56 RPB3::TAP::KlacTRP1 imd2Δ::HIS3 ssl2∆::hph sub1∆::natMX
CKY2526	pRS315 SSL2	pCK1480	MATa ura3-52 his3Δ200 leu2Δ0 or Δ1 trp1Δ63 met15Δ0 lys2-128∂ gal10Δ56 RPB3::TAP::KlacTRP1 imd2Δ::HIS3 ssl2∆::hph sub1∆::natMX
CKY2529	pRS315 ssl2 L225P	pCK1831	MATa ura3-52 his3Δ200 leu2Δ0 or Δ1 trp1Δ63 met15Δ0 lys2-128∂ gal10Δ56 RPB3::TAP::KlacTRP1 ssl2∆::hph sub1∆::natMX
CKY2530	pRS315 ssl2 L225P	pCK1831	MATa ura3-52 his3Δ200 leu2Δ0 or Δ1 trp1Δ63 met15Δ0 lys2-128∂ gal10Δ56 RPB3::TAP::KlacTRP1 ssl2∆::hph sub1∆::natMX
CKY2531	pRS315 ssl2 N230I	pCK1834	MATa ura3-52 his3Δ200 leu2Δ0 or Δ1 trp1Δ63 met15Δ0 lys2-128∂ gal10Δ56 RPB3::TAP::KlacTRP1 ssl2∆::hph sub1∆::natMX
CKY2532	pRS315 ssl2 N230I	pCK1834	MATa ura3-52 his3Δ200 leu2Δ0 or Δ1 trp1Δ63 met15Δ0 lys2-128∂ gal10Δ56 RPB3::TAP::KlacTRP1 ssl2∆::hph sub1∆::natMX
CKY2533	pRS315 ssl2 N230D	pCK1835	MATa ura3-52 his3Δ200 leu2Δ0 or Δ1 trp1Δ63 met15Δ0 lys2-128∂ gal10Δ56 RPB3::TAP::KlacTRP1 ssl2∆::hph sub1∆::natMX
CKY2534	pRS315 ssl2 N230D	pCK1835	MATa ura3-52 his3Δ200 leu2Δ0 or Δ1 trp1Δ63 met15Δ0 lys2-128∂ gal10Δ56 RPB3::TAP::KlacTRP1 ssl2∆::hph sub1∆::natMX
CKY2535	pRS315 ssl2 V473D	pCK1852	MATa ura3-52 his3Δ200 leu2Δ0 or Δ1 trp1Δ63 met15Δ0 lys2-128∂ gal10Δ56 RPB3::TAP::KlacTRP1 ssl2∆::hph sub1∆::natMX
CKY2536	pRS315 ssl2 V473D	pCK1852	MATa ura3-52 his3Δ200 leu2Δ0 or Δ1 trp1Δ63 met15Δ0 lys2-128∂ gal10Δ56 RPB3::TAP::KlacTRP1 ssl2∆::hph sub1∆::natMX
CKY2537	pRS315 ssl2 D522V	pCK1854	MATa ura3-52 his3Δ200 leu2Δ0 or Δ1 trp1Δ63 met15Δ0 lys2-128∂ gal10Δ56 RPB3::TAP::KlacTRP1 ssl2∆::hph sub1∆::natMX
CKY2538	pRS315 ssl2 D522V	pCK1854	MATa ura3-52 his3Δ200 leu2Δ0 or Δ1 trp1Δ63 met15Δ0 lys2-128∂ gal10Δ56 RPB3::TAP::KlacTRP1 ssl2∆::hph sub1∆::natMX
CKY2539	pRS315 ssl2 R636C	pCK1861	MATa ura3-52 his3Δ200 leu2Δ0 or Δ1 trp1Δ63 met15Δ0 lys2-128∂ gal10Δ56 RPB3::TAP::KlacTRP1 ssl2∆::hph sub1∆::natMX
CKY2540	pRS315 ssl2 R636C	pCK1861	MATa ura3-52 his3Δ200 leu2Δ0 or Δ1 trp1Δ63 met15Δ0 lys2-128∂ gal10Δ56 RPB3::TAP::KlacTRP1 ssl2∆::hph sub1∆::natMX
CKY2541	pRS315 ssl2 Y750*	pCK1825	MATa ura3-52 his3Δ200 leu2Δ0 or Δ1 trp1Δ63 met15Δ0 lys2-128∂ gal10Δ56 RPB3::TAP::KlacTRP1 ssl2∆::hph sub1∆::natMX
CKY2542	pRS315 ssl2 Y750*	pCK1825	MATa ura3-52 his3Δ200 leu2Δ0 or Δ1 trp1Δ63 met15Δ0 lys2-128∂ gal10Δ56 RPB3::TAP::KlacTRP1 ssl2∆::hph sub1∆::natMX
CKY2543	pRS315 SSL2	pCK1480	MATa ura3-52 his3Δ200 leu2Δ0 or Δ1 trp1Δ63 met15Δ0 lys2-128∂ gal10Δ56 RPB3::TAP::KlacTRP1 ssl2∆::hph sub1∆::natMX
CKY2544	pRS315 SSL2	pCK1480	MATa ura3-52 his3Δ200 leu2Δ0 or Δ1 trp1Δ63 met15Δ0 lys2-128∂ gal10Δ56 RPB3::TAP::KlacTRP1 ssl2∆::hph sub1∆::natMX
